# Supplementary material for: Bidirectional photoswitchability in an iron( iii ) spin crossover complex: symmetry-breaking and solvent effects
Source: Royal Society of Chemistry journal article supplement (doi:10.1039/d3sc01495a), 2023-01-01
Supplement: d3sc01495a1.pdf [file d3sc01495a1.pdf]

## **Bidirectional photoswitchability in an iron(III) spin crossover complex: Symmetry-breaking and solvent effects**

Raúl Díaz-Torres,<sup>a</sup> Guillaume Chastanet,<sup>b</sup> Eric Collet,<sup>c</sup> Elzbieta Trzop,<sup>c</sup>  
Phimphaka Harding\*<sup>d</sup> and David J. Harding\*<sup>d</sup>

<sup>a</sup> Thammasat University Research Unit in Multifunctional Crystalline Materials and Applications (TU-MCMA), Faculty of Science and Technology, Thammasat University, Pathum Thani 12121, Thailand

Previous address: Functional Materials and Nanotechnology Centre of Excellence, Walailak University, Thasala, Nakhon Si Thammarat, 80160, Thailand

<sup>b</sup> Université de Bordeaux, ICMCB, 87 avenue du Dr A. Schweitzer, Pessac, F-33608, France

<sup>c</sup> Univ Rennes, CNRS, IPR (Institut de Physique de Rennes) - UMR 6251, F-35000 Rennes, France

<sup>d</sup> School of Chemistry, Institute of Science, Suranaree University of Technology, Nakhon Ratchasima, 30000, Thailand

Previous address: Functional Materials and Nanotechnology Centre of Excellence, Walailak University, Thasala, Nakhon Si Thammarat, 80160, Thailand

E-mail: david@g.sut.ac.th or phimphaka@g.sut.ac.th

| Contents                                                                                                                                                                                                                                                                                                                                                     | Page<br>No. |
|--------------------------------------------------------------------------------------------------------------------------------------------------------------------------------------------------------------------------------------------------------------------------------------------------------------------------------------------------------------|-------------|
| Experimental details                                                                                                                                                                                                                                                                                                                                         | 4           |
| X-ray crystallography                                                                                                                                                                                                                                                                                                                                        | 4           |
| Physical Measurements                                                                                                                                                                                                                                                                                                                                        | 5           |
| Table S1: Spin state assignment, intermolecular interactions, interplanar and interchain distances of <b>1</b> and <b>2</b> at different temperatures.                                                                                                                                                                                                       | 6           |
| Table S2: Selected Fe-N/O bond length (Å), volume cell (Å <sup>3</sup> ) and octahedral distortion parameters at various temperatures for all compounds.                                                                                                                                                                                                     | 7           |
| Table S3: List of Fe <sup>III</sup> systems that exhibit symmetry-breaking.                                                                                                                                                                                                                                                                                  | 9           |
| Table S4: Crystallographic data and structure refinement of all compounds.                                                                                                                                                                                                                                                                                   | 10          |
| Table S5: Distances between the chains ( $d_{\text{chain}}$ ) and the planes ( $d_{\text{plane}}$ ) at different temperatures                                                                                                                                                                                                                                | 12          |
| Table S6: List of Fe <sup>III</sup> systems that exhibit photoactivation.                                                                                                                                                                                                                                                                                    | 13          |
| Table S7: Intermolecular interactions of all compounds (Å).                                                                                                                                                                                                                                                                                                  | 15          |
| Table S8: Intermolecular interactions contributions for [Fe(qsal-I) <sub>2</sub> ] <sub>2</sub> NO <sub>3</sub> ·2MeOH <b>1</b> , [Fe(qsal-I) <sub>2</sub> ] <sub>2</sub> NO <sub>3</sub> ·2EtOH <b>2</b> and [Fe(qsal-Br) <sub>2</sub> ] <sub>2</sub> NO <sub>3</sub> ·2MeOH.                                                                               | 21          |
| Figure S1: Asymmetric unit of <b>2</b> at 150 K.                                                                                                                                                                                                                                                                                                             | 17          |
| Figure S2: Structure representation of the supramolecular 1D chain for <b>2</b> at 150 K.                                                                                                                                                                                                                                                                    | 18          |
| Figure S3: Structure representation of the supramolecular 2D plane <b>2</b> at 300 K.                                                                                                                                                                                                                                                                        | 18          |
| Figure S4: Structure representation of the 3D structure of <b>2</b> at 300 K.                                                                                                                                                                                                                                                                                | 19          |
| Figure S5: 3D structure representation connecting the 2D planes through halogen interactions (I-I) for <b>1</b> at 300 K.                                                                                                                                                                                                                                    | 19          |
| Figure S6: 2D supramolecular square structure connecting different chains involving the methanol and nitrate molecules for <b>1</b> at 150 K.                                                                                                                                                                                                                | 20          |
| Figure S7: View of $d_{\text{chain}}$ and $d_{\text{plane}}$ of <b>1</b> and <b>2</b> at 300 K and 150 K.                                                                                                                                                                                                                                                    | 20          |
| Figure S8: Percentage contributions of interactions for <b>1–3</b> at all temperatures.                                                                                                                                                                                                                                                                      | 21          |
| Figure S9: Hirshfeld surface 2D fingerprint plots: all contact (top), H···O/O···H interactions (bottom) for [Fe(qsal-I) <sub>2</sub> ] <sub>2</sub> NO <sub>3</sub> ·2MeOH <b>1</b> , [Fe(qsal-I) <sub>2</sub> ] <sub>2</sub> NO <sub>3</sub> ·2EtOH <b>2</b> and [Fe(qsal-Br) <sub>2</sub> ] <sub>2</sub> NO <sub>3</sub> ·2MeOH at different temperatures. | 22          |

|                                                                                                                                                                                                                                        |    |
|----------------------------------------------------------------------------------------------------------------------------------------------------------------------------------------------------------------------------------------|----|
| Figure S10 $\chi_M T$ versus $T$ plot of <b>1</b> (upper picture). The black diamonds in the upper picture stand for the relaxation kinetics (lower picture) performed from the [HS-LS] state showing the long lifetime of this state. | 24 |
| Figure S11: $\chi_M T$ versus $T$ plot of <b>2</b> from 300 to 10 K and 10 to 300 K.                                                                                                                                                   | 25 |
| Figure S12: $\chi_M T$ versus $T$ plot of <b>1</b> from 10 to 350 K and 350 to 10 K.                                                                                                                                                   | 25 |
| Figure S13: $\chi_M T$ versus $T$ plot of <b>2</b> from 10 to 350 K and 350 to 10 K.                                                                                                                                                   | 26 |
| Figure S14: $\chi_M T$ versus $T$ plot of <b>1</b> and <b>2</b> from 350 to 10 K.                                                                                                                                                      | 26 |
| Figure S15: TGA curves for <b>1</b> (red) and <b>2</b> (blue).                                                                                                                                                                         | 27 |
| Figure S16: Structure representation of the 2D supramolecular structure showing the I...O (nitrate) halogen bond in <b>1</b> upon irradiation at 660 nm and 980 nm.                                                                    | 28 |
| Figure S17: Experimental PXRD diffractograms (blue) and the corresponding simulated patterns (red) for <b>1-2</b> .                                                                                                                    | 29 |
| Figure S18: Comparison of the experimental PXRD diffractograms <b>1</b> and <b>2</b> .                                                                                                                                                 | 30 |
| References                                                                                                                                                                                                                             | 31 |

## EXPERIMENTAL DETAILS

**Materials.** All reactions were carried out in aerobic conditions using commercial grade solvents for the synthesis of all compounds. All chemicals were purchased from TCI Chemicals or Sigma-Aldrich and used as received. Hqsal-I ligand was prepared as previously reported.<sup>1</sup>

**Synthesis of [Fe(qsal-I)<sub>2</sub>]NO<sub>3</sub>·2MeOH 1:** Hqsal-I (74.8 mg, 0.2 mmol) was dissolved in DCM (3 mL) giving an orange solution. NEt<sub>3</sub> (28 μL, 0.2 mmol) was added and the solution was stirred for 5 min resulting in a change to dark orange. Next, blank MeOH (5 mL) was layered on the top of the Hqsal-I solution. In a separate flask, Fe(NO<sub>3</sub>)<sub>3</sub>·9H<sub>2</sub>O (40.4 mg, 0.1 mmol) was dissolved in MeOH (5 mL), filtered and then layered on the top of the previous solution and left for 4 days. The black crystals were formed (58 mg, 66 %). Anal. Calcd. for FeC<sub>32</sub>H<sub>22</sub>O<sub>6</sub>N<sub>5</sub>I<sub>2</sub> (882.21 g·mol<sup>-1</sup>): C 43.56 %, H 2.51 %, N 7.94 %. Found: C 43.99 %, H 2.61 %, N 7.74 %. ESI<sup>+</sup> (m/z): 802.0 [Fe(qsal-I)<sub>2</sub>]<sup>+</sup>. IR Data (KBr, cm<sup>-1</sup>): 3045 (ν<sub>C-H</sub>), 1598 (ν<sub>C=N</sub>), 1384 (ν<sub>N-O</sub>).

*Note: While elemental analysis is for the desolvated complex due to solvent loss during transport for EA, all structural, magnetic, powder diffraction and TGA data were conducted on fresh samples which clearly contain MeOH.*

**Synthesis of [Fe(qsal-I)<sub>2</sub>]NO<sub>3</sub>·2EtOH 2:** The same procedure as above was followed but substituting MeOH for EtOH (61 mg, 69 %). Anal. Calcd. for FeC<sub>32</sub>H<sub>20</sub>I<sub>2</sub>N<sub>5</sub>O<sub>5</sub>·2EtOH (940.28 g·mol<sup>-1</sup>): C 45.98 %, H 3.43 %, N 7.45 %. Found: C 45.82 %, H 3.34 %, N 7.52 ESI<sup>+</sup> (m/z): 801.9 [Fe(qsal-I)<sub>2</sub>]<sup>+</sup> IR Data (KBr, cm<sup>-1</sup>): 3039 (ν<sub>C-H</sub>), 1598 (ν<sub>C=N</sub>), 1382 (ν<sub>N-O</sub>).

## X-ray Crystallography

The diffraction data of **1-2** were collected on a Rigaku SuperNova diffractometer with a HyPix 3000 detector using Cu Kα radiation (λ = 1.54184 Å). Photocrystallographic single-crystal X-ray studies of **1** were performed at 10 K on an Oxford Diffraction Xcalibur3 diffractometer, using MoKα radiation (λ = 0.71073 Å) and fitted with the Helijet Oxford Diffraction Cryostat. Irradiation of **1** took place at the thermally reached intermediate [HS-LS] state. Data collections were taken both before and after irradiation with 660 nm (at ca. 2 mW power) cw-laser reaching full conversion to LS state, and then, from LS state with 980 nm (at ca. 6 mW power) cw-laser reaching photoinduced HS state.

In all cases, data reduction, scaling, and absorption corrections were performed using CrysAlisPro.<sup>2</sup> The structures were solved, and the space group  $P\bar{1}$  was determined by intrinsic phasing using ShelXT<sup>3</sup> and refined by full matrix least-squares minimization on  $F^2$  using SHELXL.<sup>4</sup> All non-hydrogen atoms were refined anisotropically. Hydrogen atoms were

included in calculated positions and refined with isotropic thermal parameters, which were 1.2× the equivalent isotropic thermal parameters of their parent carbon atoms. When necessary SHELXL constrains and/or restraints have been applied. All pictures were generated with OLEX2.<sup>5</sup> Crystallographic data for the structures have been deposited with the Cambridge Crystallographic Data Centre (CCDC) under: 2220036-2220047. Powder X-ray diffraction data were measured on a Rigaku SuperNova diffractometer with a HyPix 3000 detector using Cu-K $\alpha$  radiation ( $\lambda = 1.54184 \text{ \AA}$ ). The samples were grounded and then suspended in Fomblim Y oil, and the data were collected between  $2\theta = 5\text{--}80^\circ$ .

### **Physical measurements**

Infrared spectra ( $4000\text{--}400 \text{ cm}^{-1}$ ) were recorded as KBr pellets on a PerkinElmer Spectrum One infrared spectrophotometer. Elemental analyses were carried out by using a Eurovector EA3000 analyzer. ESI-MS were carried out on a Bruker AmaZon X LCMS Mass Spectrometer. Magnetic measurements were performed using a MPMS 7XL SQUID Magnetometer from Quantum design, operating at 20 kOe of applied magnetic field at the same temperature scan rate of 0.5 K/min. The thermal spin crossover behaviours were recorded on sample wrapped in polypropylene bag which diamagnetic contribution was removed. The photoswitching was recorded directly in the SQUID magnetometer through an optical fibre placed close to the sample (6 cm). Irradiation was applied on a thin layer of compound and the thermal behavior after irradiation was recorded according to the T(LIESST) protocol.<sup>6–8</sup> The irradiations were provided by a home-made set of laser diodes.

**Table S1** Spin state assignation, intermolecular interactions, interplanar and interchain distances of **1** and **2** at different temperatures. The compound  $[\text{Fe}(\text{qsal-Br})_2]\text{NO}_3 \cdot 2\text{MeOH}$  has also added for comparison.<sup>9</sup>

|                                   | $[\text{Fe}(\text{qsal-I})_2]\text{NO}_3 \cdot 2\text{MeOH}$ |       |       | $[\text{Fe}(\text{qsal-I})_2]\text{NO}_3 \cdot 2\text{EtOH}$ |       | $[\text{Fe}(\text{qsal-Br})_2]\text{NO}_3 \cdot 2\text{MeOH}$ |       |       |
|-----------------------------------|--------------------------------------------------------------|-------|-------|--------------------------------------------------------------|-------|---------------------------------------------------------------|-------|-------|
|                                   | 300 K                                                        | 150 K |       | 300 K                                                        | 150 K | 280 K                                                         | 175 K |       |
| Temperature                       |                                                              |       |       |                                                              |       |                                                               |       |       |
| Iron Centres                      | 1                                                            | 2     |       | 1                                                            | 1     | 1                                                             | 2     |       |
|                                   | Fe1                                                          | Fe1   | Fe2   | Fe1                                                          | Fe1   | Fe1                                                           | Fe1   | Fe2   |
| Spin state                        | HS                                                           | HS    | LS    | HS                                                           | LS    | HS                                                            | HS    | LS    |
| $\pi$ - $\pi$ (Type A)            | 3.476                                                        | 3.374 | 3.437 | 3.427                                                        | 3.325 | 3.462                                                         | 3.437 | 3.374 |
| $\pi$ - $\pi$ (Type B)            | 3.337                                                        | 3.287 | 3.319 | 3.306                                                        | 3.254 | 3.339                                                         | 3.327 | 3.286 |
| (P4AE)CH $\cdots$ C <sub>cn</sub> | 2.753                                                        | 2.663 | 2.748 | 2.902                                                        | 2.911 | 2.679                                                         | 2.611 | 2.649 |
| (P4AE) $\pi$ - $\pi$              | 3.686                                                        | 3.603 |       | 3.906                                                        | 3.876 | 3.396                                                         | 3.379 |       |
| O $\cdots$ I (ROH)                | 3.094                                                        | 3.068 | 2.975 | 3.185                                                        | 3.052 | 3.163                                                         | 3.227 | 2.990 |
| O $\cdots$ I (NO <sub>3</sub> )   | 3.508                                                        | 3.498 | 3.624 | 3.378                                                        | 3.384 | 3.609                                                         | 3.610 | 3.730 |
| $d_{\text{plane}}$                | 12.48                                                        | 12.47 | 12.28 | 12.33                                                        | 12.01 | 12.32                                                         | 12.30 | 12.07 |
| $d_{\text{chain}}$                | 12.01                                                        | 12.23 | 11.72 | 12.29                                                        | 12.31 | 12.02                                                         | 12.27 | 11.77 |

**Table S2** Selected Fe-N/O bond length (Å), volume cell (Å<sup>3</sup>) and octahedral distortion parameters at various temperatures for all compounds. The Fe1 and Fe2 sites are equivalent at 300, 240 and 10 K after irradiation at 660 nm or 980 nm.

| [Fe(qsal-l) <sub>2</sub> ]NO <sub>3</sub> ·2MeOH |                         |          |          |          |             |                         |          |          |          |                     |                     |
|--------------------------------------------------|-------------------------|----------|----------|----------|-------------|-------------------------|----------|----------|----------|---------------------|---------------------|
|                                                  | 1 <sup>st</sup> cooling |          |          |          | 1st warming | 2 <sup>nd</sup> cooling |          |          | Dark     | Irradiated (660 nm) | Irradiated (980 nm) |
|                                                  | 300 K                   | 240 K    | 150 K    | 100 K    | 300 K       | 240 K                   | 150 K    | 10 K     | 10 K     | 10 K                |                     |
| <b>Fe1-O1ph</b>                                  | 1.912(4)                | 1.908(3) | 1.878(3) | 1.876(4) | 1.908(5)    | 1.906(5)                | 1.882(2) | 1.883(2) | 1.885(3) | 1.914(2)            |                     |
| <b>Fe1-O2ph</b>                                  | 1.913(5)                | 1.913(3) | 1.877(3) | 1.883(4) | 1.908(5)    | 1.914(5)                | 1.882(2) | 1.884(2) | 1.882(4) | 1.909(3)            |                     |
| <b>Fe1-Oph<sub>av</sub></b>                      | 1.913                   | 1.911    | 1.877    | 1.879    | 1.908       | 1.910                   | 1.882    | 1.884    | 1.883    | 1.911               |                     |
| <b>Fe1-N1quin</b>                                | 2.160(5)                | 2.145(4) | 1.979(6) | 1.987(5) | 2.140(5)    | 2.160(5)                | 1.983(3) | 1.947(3) | 1.969(4) | 2.103(3)            |                     |
| <b>Fe1-N2im</b>                                  | 2.111(5)                | 2.099(3) | 1.950(6) | 1.947(4) | 2.108(4)    | 2.109(5)                | 1.952(3) | 1.987(2) | 1.998(3) | 2.136(3)            |                     |
| <b>Fe1-N3quin</b>                                | 2.146(5)                | 2.132(4) | 1.983(3) | 1.982(5) | 2.157(5)    | 2.135(6)                | 1.991(3) | 1.947(3) | 1.969(4) | 2.107(3)            |                     |
| <b>Fe1-N4im</b>                                  | 2.113(5)                | 2.105(3) | 1.952(3) | 1.944(4) | 2.118(4)    | 2.113(5)                | 1.952(3) | 1.978(3) | 2.008(4) | 2.149(3)            |                     |
| <b>Fe1-N<sub>av</sub></b>                        | 2.132                   | 2.120    | 1.966    | 1.965    | 2.131       | 2.129                   | 1.9695   | 1.964    | 1.986    | 2.123               |                     |
| <b>Fe2-O3ph</b>                                  | -                       | -        | 1.915    | 1.915(4) | -           | -                       | 1.912(3) | 1.914(2) | -        | -                   |                     |
| <b>Fe2-O4ph</b>                                  | -                       | -        | 1.907    | 1.913(4) | -           | -                       | 1.913(2) | 1.913(2) | -        | -                   |                     |
| <b>Fe2-Oph<sub>av</sub></b>                      | -                       | -        | 1.911    | 1.914    | -           | -                       | 1.913    | 1.914    | -        | -                   |                     |
| <b>Fe2-N5quin</b>                                | -                       | -        | 2.144    | 2.158(5) | -           | -                       | 2.143(3) | 2.099(3) | -        | -                   |                     |
| <b>Fe2-N6im</b>                                  | -                       | -        | 2.115    | 2.101(5) | -           | -                       | 2.110(3) | 2.150(2) | -        | -                   |                     |
| <b>Fe2-N7quin</b>                                | -                       | -        | 2.161    | 2.138(5) | -           | -                       | 2.160(3) | 2.100(3) | -        | -                   |                     |
| <b>Fe2-N8im</b>                                  | -                       | -        | 2.117    | 2.106(4) | -           | -                       | 2.109(3) | 2.131(3) | -        | -                   |                     |
| <b>Fe2-N<sub>av</sub></b>                        | -                       | -        | 2.134    | 2.125    | -           | -                       | 2.131    | 2.120    | -        | -                   |                     |
| <b>V / Å<sup>3</sup></b>                         | 1699                    | 1682     | 3316     | 3292     | 1702        | 1673                    | 3316     | 3267     | 1631     | 1637                |                     |
| <b>Σ-Fe1, Fe2</b>                                | 65                      | 60       | 44, 65   | 43, 63   | 65          | 65                      | 43, 64   | 44, 61   | 40       | 61                  |                     |
| <b>⊖-Fe1, Fe2</b>                                | 235                     | 222      | 114, 247 | 110, 237 | 236         | 239                     | 113, 242 | 114, 235 | 118      | 229                 |                     |

| <b>[Fe(qsal-l)<sub>2</sub>]NO<sub>3</sub>·2EtOH</b> |              |              |
|-----------------------------------------------------|--------------|--------------|
| <b>1<sup>st</sup> cooling</b>                       |              |              |
|                                                     | <b>300 K</b> | <b>150 K</b> |
| <b>Fe1-O1ph</b>                                     | 1.904(3)     | 1.877(2)     |
| <b>Fe1-O2ph</b>                                     | 1.898(4)     | 1.875(2)     |
| <b>Fe1-Oph<sub>av</sub></b>                         | 1.901        | 1.876        |
| <b>Fe1-N1quin</b>                                   | 2.113(4)     | 1.984(3)     |
| <b>Fe1-N2im</b>                                     | 2.083(4)     | 1.951(3)     |
| <b>Fe1-N3quin</b>                                   | 2.128(3)     | 1.983(3)     |
| <b>Fe1-N4im</b>                                     | 2.083(4)     | 1.944(3)     |
| <b>Fe1-N<sub>av</sub></b>                           | 2.102        | 1.965        |
| <b>V / Å<sup>3</sup></b>                            | 1785         | 1732         |
| <b>Σ-Fe1, Fe2</b>                                   | 60           | 45           |
| <b>⊕-Fe1, Fe2</b>                                   | 204          | 117          |



**Table S3** List of Fe<sup>III</sup> systems that exhibit symmetry-breaking.

| Compound                                                                                   | Type of SCO        | steps | Cryst. phase | Centers               | Spin states                          | Sym. breaking | Ref |
|--------------------------------------------------------------------------------------------|--------------------|-------|--------------|-----------------------|--------------------------------------|---------------|-----|
| [Fe <sup>III</sup> (Him) <sub>2</sub> (4MeOchapen)]CF <sub>3</sub> SO <sub>3</sub>         | abrupt and gradual | 2     | 2            | From 1 -> 4           | HS -> [3HS-LS]                       | incomplete    | 10  |
| [Fe <sup>III</sup> (H-5-Br-thsa)(5-Br-thsa)]·H <sub>2</sub> O                              | abrupt and gradual | 5/6   | 4            | From 1 -> 4 -> 2 -> 1 | [HS] -> [3HS-1LS] -> [HS-LS] -> [LS] | complete      | 11  |
| [Fe <sup>III</sup> (3,5-OMe-sal <sub>2</sub> bapen)]ClO <sub>4</sub>                       | gradual            | 2     | 3            | From 1 -> 3 -> 3      | HS -> [2HS-LS] -> [HS-2LS]           | incomplete    | 12  |
| [Fe <sup>III</sup> (salpm) <sub>2</sub> ]ClO <sub>4</sub> ·0.5EtOH                         | abrupt             | 2     | 3            | From 2 -> 4 -> 2      | [2HS] -> [LS-3HS] -> [2LS]           | complete      | 13  |
| [Fe <sup>III</sup> (nsal <sub>2</sub> trien)]SCN                                           | abrupt and gradual | 2     | 3            | From 1 -> 2 -> 1      | [HS] -> [HS-LS] -> [LS]              | complete      | 14  |
| [Fe <sup>III</sup> (qsal-Br) <sub>2</sub> ]NO <sub>3</sub> ·2MeOH                          | abrupt             | 2     | 3            | From 1 -> 2 -> 1      | [HS] -> [HS-LS] -> [LS]              | complete      | 9   |
| [Fe <sup>III</sup> (psalpm <sup>C</sup> ) <sub>2</sub> ]PTFB                               | abrupt             | 1     | 2            | From 1 -> 2           | [HS] -> [HS-LS]                      | incomplete    | 15  |
| [Fe <sup>III</sup> (qsal-4-F) <sub>2</sub> ]NO <sub>3</sub> ·0.91MeOH·0.57H <sub>2</sub> O | abrupt and gradual | 2     | 2            | From 1 -> 2 -> 2      | HS -> [HS-LS] -> [LS-LS]             | complete      | 16  |
| [Fe(qsal) <sub>2</sub> ][C <sub>6</sub> F <sub>3</sub> I <sub>3</sub> ]                    | gradual            | 1     | 2            | From 1 -> 2           | [HS] -> [HS-LS]                      | incomplete    | 23  |

**Table S4** Crystallographic data and structure refinement of all compounds.

|                                                 | <b>[Fe(qsal-I)<sub>2</sub>]NO<sub>3</sub>·2MeOH</b>                            |              |              |              |                               |              |              |              |                                  |                                  |
|-------------------------------------------------|--------------------------------------------------------------------------------|--------------|--------------|--------------|-------------------------------|--------------|--------------|--------------|----------------------------------|----------------------------------|
|                                                 | <b>1<sup>st</sup> cooling</b>                                                  |              |              |              | <b>1<sup>st</sup> warming</b> |              |              | <b>Dark</b>  | <b>Irradiated</b><br>(λ= 660 nm) | <b>Irradiated</b><br>(λ= 980 nm) |
|                                                 | <b>300 K</b>                                                                   | <b>240 K</b> | <b>150 K</b> | <b>100 K</b> | <b>300 K</b>                  | <b>240 K</b> | <b>150 K</b> | <b>10 K</b>  | <b>10 K</b>                      | <b>10 K</b>                      |
| <b>Empirical formula</b>                        | C <sub>34</sub> H <sub>28</sub> FeI <sub>2</sub> N <sub>5</sub> O <sub>7</sub> |              |              |              |                               |              |              |              |                                  |                                  |
| <b>Formula weight / gmol<sup>-1</sup></b>       | 928.30                                                                         |              |              |              |                               |              |              |              |                                  |                                  |
| <b>Crystal system</b>                           | Triclinic                                                                      |              |              |              |                               |              |              |              |                                  |                                  |
| <b>Space group</b>                              | P $\bar{1}$                                                                    | P $\bar{1}$  | P $\bar{1}$  | P $\bar{1}$  | P $\bar{1}$                   | P $\bar{1}$  | P $\bar{1}$  | P $\bar{1}$  | P $\bar{1}$                      | P $\bar{1}$                      |
| <b>a / Å</b>                                    | 12.007(9)                                                                      | 11.965(17)   | 12.75426(7)  | 12.732(18)   | 12.008(3)                     | 11.929(5)    | 12.754(7)    | 12.7132(2)   | 11.9612(5)                       | 11.8742(4)                       |
| <b>b / Å</b>                                    | 12.471(10)                                                                     | 12.453(18)   | 13.88144(8)  | 13.820(16)   | 12.483(3)                     | 12.458(4)    | 13.881(8)    | 13.7693(2)   | 12.2958(4)                       | 12.3742(3)                       |
| <b>c / Å</b>                                    | 12.897(5)                                                                      | 12.838(17)   | 20.01371(9)  | 20.000(2)    | 12.908(3)                     | 12.827(5)    | 20.013(9)    | 19.9776(3)   | 12.6524(4)                       | 12.7752(3)                       |
| <b>α / °</b>                                    | 80.540(5)                                                                      | 80.742(11)   | 92.0011(4)   | 91.905(9)    | 80.487(18)                    | 80.346(3)    | 92.001(4)    | 91.9450(10)  | 82.206(3)                        | 80.502(2)                        |
| <b>β / °</b>                                    | 69.855(5)                                                                      | 69.681(13)   | 107.5267(5)  | 107.56(12)   | 69.833(19)                    | 69.770(3)    | 107.526(5)   | 107.6440(10) | 69.547(3)                        | 69.212(3)                        |
| <b>γ / °</b>                                    | 69.795(7)                                                                      | 69.794(13)   | 99.7927(5)   | 99.860(11)   | 69.770(2)                     | 69.483(3)    | 99.792(5)    | 100.0190(10) | 69.329(3)                        | 68.990(3)                        |
| <b>Cell volume / Å<sup>3</sup></b>              | 1699.5(2)                                                                      | 1681.8(4)    | 3315.63(3)   | 3292.3(7)    | 1702.1(7)                     | 1672.9(11)   | 3315.6(3)    | 3267.76(9)   | 1631.10(11)                      | 1636.69(9)                       |
| <b>Z</b>                                        | 2                                                                              | 2            | 4            | 4            | 2                             | 2            | 4            | 4            | 2                                | 2                                |
| <b>Absorption coefficient / mm<sup>-1</sup></b> | 18.295                                                                         | 18.487       | 18.756       | 18.889       | 18.268                        | 18.586       | 18.756       | 2.409        | 2.414                            | 2.405                            |
| <b>Reflections collected</b>                    | 25766                                                                          | 24574        | 95917        | 44074        | 22886                         | 24987        | 95849        | 52595        | 19809                            | 23564                            |
| <b>Independent reflections,</b>                 | 6029,                                                                          | 6223,        | 12347,       | 12042,       | 6167,                         | 6100,        | 12346,       | 14257,       | 6903,                            | 7147,                            |
| <b>R<sub>int</sub></b>                          | 0.0441                                                                         | 0.0630       | 0.0323       | 0.1165       | 0.1375                        | 0.1206       | 0.0336       | 0.0315       | 0.0500                           | 0.0436                           |
| <b>Max. and min. transmission</b>               | 0.427                                                                          | 0.656        | 0.867        | 0.301        | 0.352                         | 0.295        | 0.521        | 0.764        | 0.945                            | 0.962                            |
| <b>Restraints/parameters</b>                    | 0/446                                                                          | 0/446        | 0/891        | 144/891      | 0/441                         | 1/446        | 0/891        | 89/931       | 0/446                            | 0/446                            |
| <b>Final R indices [I&gt;=2σ (I)]</b>           | 0.0544                                                                         | 0.0428       | 0.0375       | 0.0675       | 0.0601                        | 0.0712       | 0.0373       | 0.0295       | 0.0401                           | 0.0315                           |
| <b>R<sub>1</sub>, wR<sub>2</sub></b>            | 0.1592                                                                         | 0.1171       | 0.1035       | 0.1757       | 0.1673                        | 0.2064       | 0.1035       | 0.0701       | 0.0772                           | 0.0623                           |
| <b>CCDC No.</b>                                 | 2220036                                                                        | 2220037      | 2220038      | 2220039      | 2220040                       | 2220041      | 2220042      | 2220043      | 2220044                          | 2220045                          |

|                                                 | <b>[Fe(qsal-I)<sub>2</sub>]NO<sub>3</sub>·2EtOH</b>                            |              |
|-------------------------------------------------|--------------------------------------------------------------------------------|--------------|
|                                                 | <b>300 K</b>                                                                   | <b>150 K</b> |
| <b>Empirical formula</b>                        | C <sub>36</sub> H <sub>32</sub> FeI <sub>2</sub> N <sub>5</sub> O <sub>7</sub> |              |
| <b>Formula weight / gmol<sup>-1</sup></b>       | 956.30                                                                         |              |
| <b>Crystal system</b>                           | Triclinic                                                                      |              |
| <b>Space group</b>                              | P $\bar{1}$                                                                    | P $\bar{1}$  |
| <b>a / Å</b>                                    | 12.295(3)                                                                      | 12.079(13)   |
| <b>b / Å</b>                                    | 12.335(3)                                                                      | 12.309(12)   |
| <b>c / Å</b>                                    | 13.121(3)                                                                      | 12.907(11)   |
| <b>α / °</b>                                    | 81.189(19)                                                                     | 72.615(8)    |
| <b>β / °</b>                                    | 71.562(2)                                                                      | 82.731(8)    |
| <b>γ / °</b>                                    | 71.229(2)                                                                      | 71.135(9)    |
| <b>Cell volume / Å<sup>3</sup></b>              | 1784.5(8)                                                                      | 1732.3(3)    |
| <b>Z</b>                                        | 2                                                                              | 2            |
| <b>Absorption coefficient / mm<sup>-1</sup></b> | 17.447                                                                         | 17.973       |
| <b>Reflections collected</b>                    | 26380                                                                          | 27592        |
| <b>Independent reflections, R<sub>int</sub></b> | 6412, 0.0601                                                                   | 6318, 0.0429 |
| <b>Max. and min. transmission</b>               | 0.485, 0.216                                                                   | 0.504, 0.229 |
| <b>Restraints/parameters</b>                    | 15/549                                                                         | 0/539        |
| <b>Final R indices [I&gt;=2σ (I)]</b>           | 0.0402                                                                         | 0.0293       |
| <b>R<sub>1</sub>, wR<sub>2</sub></b>            | 0.0988                                                                         | 0.0718       |
| <b>CCDC No.</b>                                 | 2220046                                                                        | 2220047      |

**Table S5** Distances between the chains ( $d_{\text{chain}}$ ) and the planes ( $d_{\text{plane}}$ ) at different temperatures (LT = low temperature, RT = room temperature, HT = high temperature).

|                                           |              | [Fe(qsal-I) <sub>2</sub> ]NO <sub>3</sub> ·2MeOH |        |                    |        | [Fe(qsal-I) <sub>2</sub> ]NO <sub>3</sub> ·2EtOH |                    | [Fe(qsal-Br) <sub>2</sub> ]NO <sub>3</sub> ·2MeOH |        |                    |        |
|-------------------------------------------|--------------|--------------------------------------------------|--------|--------------------|--------|--------------------------------------------------|--------------------|---------------------------------------------------|--------|--------------------|--------|
|                                           |              | $d_{\text{plane}}$                               |        | $d_{\text{chain}}$ |        | $d_{\text{plane}}$                               | $d_{\text{chain}}$ | $d_{\text{plane}}$                                |        | $d_{\text{chain}}$ |        |
| <b>1<sup>st</sup> cooling</b>             | <b>300 K</b> | 12.472                                           |        | 12.008             |        | 12.335                                           | 12.295             | 12.325                                            |        | 12.02              |        |
|                                           | <b>240 K</b> | 12.459                                           |        | 11.929             |        | -                                                | -                  | -                                                 |        | -                  |        |
|                                           | <b>150 K</b> | 12.475                                           | 12.262 | 12.231             | 11.724 | 12.080                                           | 12.309             | 12.304                                            | 12.073 | 12.273             | 11.779 |
|                                           | <b>100 K</b> | -                                                |        | -                  |        | -                                                | -                  | 12.119                                            |        | 12.080             |        |
| <b>1<sup>st</sup> warming</b>             | <b>300 K</b> | 12.472                                           |        | 12.008             |        | -                                                | -                  | -                                                 |        | -                  |        |
|                                           | <b>240 K</b> | 12.454                                           |        | 11.965             |        | -                                                | -                  | -                                                 |        | -                  |        |
| <b>2<sup>nd</sup> cooling</b>             | <b>150 K</b> | 12.469                                           | 12.267 | 12.247             | 11.717 | -                                                | -                  | -                                                 |        | -                  |        |
|                                           | <b>Dark</b>  | <b>10 K</b>                                      | 12.412 | 12.237             | 12.191 | 11.684                                           |                    |                                                   | -      |                    | -      |
| <b>Irradiated</b><br>( $\lambda= 660$ nm) | <b>10 K</b>  | 12.296                                           |        | 11.961             |        | -                                                | -                  | -                                                 |        | -                  |        |
| <b>Irradiated</b><br>( $\lambda= 980$ nm) | <b>10 K</b>  | 12.374                                           |        | 11.874             |        |                                                  |                    | -                                                 |        | -                  |        |

**Table S6** List of Fe<sup>III</sup> systems that exhibit photoactivation.<sup>17</sup>

| Iron(III) Complex                                                                    | Meta-Stable HS state        | T(LIESST)            | Thermal SCO behavior                                                                            | Ref       |
|--------------------------------------------------------------------------------------|-----------------------------|----------------------|-------------------------------------------------------------------------------------------------|-----------|
| [Fe(qsal-l) <sub>2</sub> ]NO <sub>3</sub> ·2MeOH                                     | 67 % at 10 K                | 38 K                 | Abrupt, no hysteresis (T <sub>1/2</sub> = 210 K)                                                | This work |
|                                                                                      | 35 % at 10 K reverse-LIESST | 45 K                 | Gradual, no hysteresis                                                                          |           |
| [Fe(qsal) <sub>2</sub> ]NCS·CH <sub>2</sub> Cl <sub>2</sub>                          | 17 % at 5 K                 | 20 K                 | Abrupt, hysteresis (T <sub>1/2</sub> (↑) = 210, 290 K, T <sub>1/2</sub> (↓) = 203 K)            | 18        |
| [Fe(qsal) <sub>2</sub> ]NCSe·CH <sub>2</sub> Cl <sub>2</sub>                         | 8 % at 5 K                  | 50 K                 | Abrupt, hysteresis (T <sub>1/2</sub> (↑) = 282 K, T <sub>1/2</sub> (↓) = 212 K)                 | 18        |
| [Fe(qsal) <sub>2</sub> ]C <sub>6</sub> H <sub>5</sub> SO <sub>3</sub> ·MeOH          | 59 % at 5 K                 | 50 K                 | Abrupt, hysteresis (T <sub>1/2</sub> (↑) = 205 K, T <sub>1/2</sub> (↓) = 195 K)                 | 19        |
| [Fe(qsal) <sub>2</sub> ][Ni(dmit) <sub>2</sub> ]·2MeCN                               | 14 % at 5 K                 | 46 K                 | Abrupt, no hysteresis (T <sub>1/2</sub> = 231 K)                                                | 20        |
| [Fe(l-qsal) <sub>2</sub> ][Ni(dmit) <sub>2</sub> ]·MeCN·H <sub>2</sub> O             | 43 % at 5 K                 | 75 K <sup>a</sup>    | Abrupt, hysteresis (T <sub>1/2</sub> (↑) = 156 K, T <sub>1/2</sub> (↓) = 150 K)                 | 21        |
| [Fe(azp)(qsal)]·0.5MeOH                                                              | 21 % at 5 K                 | 55 K <sup>a</sup>    | Abrupt, hysteresis (T <sub>1/2</sub> (↑) = 192 K, T <sub>1/2</sub> (↓) = 182 K)                 | 22        |
| [Fe(qsal) <sub>2</sub> ][C <sub>6</sub> F <sub>3</sub> I <sub>3</sub> ]              | 59 % at 10 K                | 45 K                 | Gradual, no hysteresis                                                                          | 23        |
| [Fe(qsal) <sub>2</sub> ] <sub>2</sub> [Fe(CN) <sub>5</sub> NO]·MeOH                  | 60 % at 5 K                 | 45 K                 | Gradual, no hysteresis (T <sub>1/2</sub> = 122 K)                                               | 24        |
| [Fe(qsal) <sub>2</sub> ] <sub>2</sub> [Ru(Cl) <sub>5</sub> (NO)]·2.5H <sub>2</sub> O | 20 % at 10 K                | 45 K <sup>a</sup>    | Gradual, hysteresis (T <sub>1/2</sub> (↑) = 190 K, T <sub>1/2</sub> (↓) = 183 K)                | 25        |
| [Fe(naphBzen) <sub>2</sub> ]I                                                        | 15 % at 10 K                | 40-70 K <sup>a</sup> | Abrupt, hysteresis [HS-HS]↔[HS-LS] (T <sub>1/2</sub> (↑) = 135 K, T <sub>1/2</sub> (↓) = 110 K) | 26        |
|                                                                                      | 50 % at 10 K reverse-LIESST | 60 K <sup>b</sup>    | Abrupt, hysteresis [LS-LS]↔[HS-LS] (T <sub>1/2</sub> (↑) = 60 K, T <sub>1/2</sub> (↓) = 30 K)   |           |
| [Fe(pap) <sub>2</sub> ]ClO <sub>4</sub> ·H <sub>2</sub> O                            | 59% at 5 K                  | 105 K                | Abrupt, hysteresis (T <sub>1/2</sub> (↑) = 181 K, T <sub>1/2</sub> (↓) = 165 K)                 | 27        |
| [Fe(pap) <sub>2</sub> ]BF <sub>4</sub> ·H <sub>2</sub> O                             | 50 % at 5 K                 | 100 K                | Abrupt, hysteresis (T <sub>1/2</sub> (↑) = 195 K, T <sub>1/2</sub> (↓) = 170 K)                 | 18        |
| [Fe(pap) <sub>2</sub> ]PF <sub>6</sub> ·MeOH                                         | 25 % at 5 K                 | 55 K                 | Abrupt, hysteresis (T <sub>1/2</sub> (↑) = 293 K, T <sub>1/2</sub> (↓) = 291 K)                 | 28        |

|                                                                                                              |                               |                   |                                                                                           |    |
|--------------------------------------------------------------------------------------------------------------|-------------------------------|-------------------|-------------------------------------------------------------------------------------------|----|
| [Fe(qnal) <sub>2</sub> ]OTf·MeOH                                                                             | 52 % at 5 K                   | 75 K              | Abrupt, hysteresis (T <sub>1/2</sub> (↑) = 115 K, T <sub>1/2</sub> (↓) = 104 K)           | 29 |
| [Fe(qnal) <sub>2</sub> ]OTf·acetone                                                                          | 100 % at 5 K                  | 58 K              | Abrupt, hysteresis (T <sub>1/2</sub> (↑) = 133 K, T <sub>1/2</sub> (↓) = 130 K)           | 29 |
| [Fe(qnal) <sub>2</sub> ][Pd(dmit) <sub>2</sub> ] <sub>5</sub> ·acetone                                       | 10 % at 5 K <sup>a</sup>      | 30 K <sup>a</sup> | Gradual, no hysteresis                                                                    | 30 |
| [Fe(qnal) <sub>2</sub> ]C <sub>10</sub> H <sub>7</sub> SO <sub>3</sub>                                       | 23 % at 5 K                   | 45 K              | Abrupt, hysteresis (T <sub>1/2</sub> (↑) = 219 K, T <sub>1/2</sub> (↓) = 188 K)           | 19 |
| [Fe(qnal) <sub>2</sub> ]C <sub>16</sub> H <sub>9</sub> SO <sub>3</sub> ·MeOH·CH <sub>2</sub> Cl <sub>2</sub> | 44 % at 5 K                   | 62 K              | Abrupt, no hysteresis (T <sub>1/2</sub> = 240 K)                                          | 19 |
| [Fe(qnal) <sub>2</sub> ]BPh <sub>4</sub> ·CH <sub>2</sub> Cl <sub>2</sub>                                    | 65 % at 5 K                   | 25 K              | Gradual, no hysteresis (T <sub>1/2</sub> = 285 K)                                         | 31 |
| [Fe(qnal-OMe) <sub>2</sub> ]PF <sub>6</sub> ·acetone                                                         | 90 % at 5 K                   | 60 K              | Abrupt, hysteresis (T <sub>1/2</sub> (↑) = 202 K, T <sub>1/2</sub> (↓) = 194 K)           | 32 |
| [Fe(qnal-OMe) <sub>2</sub> ]BPh <sub>4</sub> ·2MeOH                                                          | 87 % at 5 K                   | 100 K             | Abrupt, hysteresis (T <sub>1/2</sub> (↑) = 304 K, T <sub>1/2</sub> (↓) = 194 K)           | 32 |
| [Fe(Hphsalpm <sup>Cl</sup> ) <sub>2</sub> ]PTFB·MeOH                                                         | 96 % at 10 K                  | 53 K              | Gradual, no hysteresis (T <sub>1/2</sub> = 153 K)                                         | 15 |
| [Fe(Hphsalpm <sup>Br</sup> ) <sub>2</sub> ]PTFB·MeOH                                                         | 96 % at 10 K                  | 42 K              | Gradual, no hysteresis (T <sub>1/2</sub> = 220 K)                                         | 15 |
| [Fe(Hphsalpm <sup>I</sup> ) <sub>2</sub> ]PTFB·MeOH                                                          | 28 % at 10 K (reverse-LIESST) | 37 K              | No transition, high spin only                                                             | 15 |
| [Fe(salpm) <sub>2</sub> ]ClO <sub>4</sub> ·0.5EtOH                                                           | 80 % at 10 K <sup>a</sup>     | 40, 50 K          | Abrupt, no hysteresis (T <sub>1/2</sub> = 115, 171 K)                                     | 33 |
| [Fe(thpu)(Hthpu)]                                                                                            | ~2 % at 20 K <sup>a</sup>     | 40 K              | Abrupt, hysteresis (T <sub>1/2</sub> (↑) = 239 K, T <sub>1/2</sub> (↓) = 225 K)           | 34 |
| (TMA)[Fe(azp) <sub>2</sub> ]                                                                                 | 59 % at 5 K <sup>a</sup>      | 68 K <sup>a</sup> | Gradual, no hysteresis                                                                    | 35 |
| [Fe(H-5-Cl-thsa-Me)(5-Cl-thsa-Me)]·H <sub>2</sub> O                                                          | 16 % at 10 K                  | 40 K              | Abrupt, hysteresis (T <sub>1/2</sub> (↑) = 249, 278 K, T <sub>1/2</sub> (↓) = 245, 270 K) | 36 |

<sup>a</sup>The percentage and temperature were estimated from the apparent values in the original papers.

<sup>b</sup>The transition temperature is for LS to an intermediate-HS state, based on the reverse-LIESST process.

**Table S7** Intermolecular interactions of all compounds (Å).

|                       |                                          | [Fe(qsal-I) <sub>2</sub> ]NO <sub>3</sub> ·2MeOH |       |                |                         |       |                         |                |                |                |                        |                        |       |       |
|-----------------------|------------------------------------------|--------------------------------------------------|-------|----------------|-------------------------|-------|-------------------------|----------------|----------------|----------------|------------------------|------------------------|-------|-------|
|                       |                                          | 1 <sup>st</sup> cooling                          |       |                | 1 <sup>st</sup> warming |       | 2 <sup>nd</sup> cooling |                |                | Dark           | Irradiated<br>(660 nm) | Irradiated<br>(980 nm) |       |       |
|                       |                                          | 300 K                                            | 240 K | 150 K          | 300 K                   | 240 K | 150 K                   | 10 K           | 10 K           | 10 K           |                        |                        |       |       |
| <b>1D chains</b>      |                                          |                                                  |       |                |                         |       |                         |                |                |                |                        |                        |       |       |
| <b>Fe-Fe</b>          |                                          |                                                  |       | <u>Fe1-Fe1</u> | <u>Fe2-Fe2</u>          |       |                         | <u>Fe1-Fe1</u> | <u>Fe2-Fe2</u> | <u>Fe1-Fe1</u> | <u>Fe2-Fe2</u>         |                        |       |       |
|                       | $\pi$ - $\pi$ (Type A)                   | Cent-plane                                       | 3.470 | 3.454          | 3.379                   | 3.443 | 3.452                   | 3.438          | 3.374          | 3.437          | 3.262                  | 3.418                  | 3.367 | 3.421 |
|                       | $\pi$ - $\pi$ (Type B)                   | Cent-plane                                       | 3.340 | 3.327          | 3.285                   | 3.322 | 3.340                   | 3.328          | 3.327          | 3.319          | 3.362                  | 3.297                  | 3.268 | 3.287 |
|                       | C-H $\cdots$ O                           | O1-H23                                           | 2.608 | 2.721          | 2.732                   | 2.760 | 2.594                   | 2.594          | 2.730          | 2.763          | 2.615                  | 2.643                  | 2.625 | 2.540 |
|                       | C-H $\cdots$ O                           | O2-H12                                           | 2.741 | 2.803          | 2.670                   | 2.676 | 2.689                   | 2.666          | 2.668          | 2.678          | 2.684                  | 2.700                  | 2.647 | 2.651 |
|                       | Fe-Fe (Type A)                           |                                                  | 6.797 | 6.777          | 6.938                   | 6.688 | 6.746                   | 6.767          | 6.935          | 6.686          | 6.917                  | 6.660                  | 6.835 | 6.707 |
|                       | Fe-Fe (Type B)                           |                                                  | 7.265 | 7.223          | 7.272                   | 7.156 | 7.226                   | 7.209          | 7.276          | 7.151          | 7.241                  | 7.120                  | 7.179 | 7.161 |
| <b>MeOH</b>           | OH <sub>m</sub> $\cdots$ C-H             | O7-H10                                           | 2.487 | 2.504          | 2.572                   | 2.473 | 2.466                   | 2.487          | 2.571          | 2.473          | 2.541                  | 2.457                  | 2.525 | 2.453 |
|                       | OH <sub>m</sub> $\cdots$ OH <sub>m</sub> | O7-H31                                           | 1.989 | 1.910          | 1.913                   | 1.898 | 1.891                   | 1.878          | 1.910          | 1.898          | 1.882                  | 1.882                  | 1.889 | 1.883 |
| <b>NO<sub>3</sub></b> | O $\cdots$ C-H                           | O3-H15                                           | 2.690 | 2.674          | 2.544                   | 2.642 | 2.651                   | 2.612          | 2.543          | 2.638          | 2.701                  | 2.367                  | 2.411 | 2.411 |
|                       | O $\cdots$ C-H                           | O3-H1                                            | 2.493 | 2.526          | 2.382                   | 2.524 | 2.553                   | 2.462          | 2.381          | 2.524          | 2.684                  | 2.630                  | 2.490 | 2.612 |
| <b>2D plane</b>       |                                          |                                                  |       |                |                         |       |                         |                |                |                |                        |                        |       |       |
| <b>P4AE</b>           | C-H $\cdots$ C <sub>centroid</sub>       |                                                  | 2.742 | 2.725          | 2.666 / 2.744           |       | 2.753                   | 2.713          | 2.663 / 2.748  |                | 2.719 / 2.719          |                        | 2.680 | 2.662 |
|                       | $\pi$ - $\pi$                            |                                                  | 3.694 | 3.665          | 3.606                   |       | 3.686                   | 3.646          | 3.603          |                | 3.575                  |                        | 3.549 | 3.608 |
|                       | C-H $\cdots$ I                           | I2-H35                                           | 3.250 | 3.244          | 3.211                   |       | 3.263                   | 3.247          | 3.210          |                | 3.360                  |                        | 3.224 | 3.128 |
| <b>MeOH</b>           | OH <sub>m</sub> $\cdots$ I               | O6-I1                                            | 3.078 | 3.064          | 3.066 / 2.976           |       | 3.094                   | 3.077          | 3.068 / 2.975  |                | -                      |                        | 2.972 | 3.223 |
|                       | O $\cdots$ OH <sub>m</sub>               | O5-H8                                            | 2.799 | 2.039          | 1.977 / 1.950           |       | 2.808                   | 2.801          | 1.975 / 1.952  |                | 1.882                  |                        | 1.889 | 1.883 |
| <b>NO<sub>3</sub></b> | NO $\cdots$ I                            | O11-I3                                           | 3.502 | 3.484          | 3.494 / 3.627           |       | 3.508                   | 3.482          | 3.498 / 3.624  |                | 3.486                  |                        | -     | 3.448 |
| <b>3D structure</b>   |                                          |                                                  |       |                |                         |       |                         |                |                |                |                        |                        |       |       |
|                       | C-H $\cdots$ I                           | I1-H30                                           | 3.262 | 3.242          | 3.226 / 3.251           |       | 3.263                   | 3.244          | 3.227 / 3.249  |                | 3.348                  |                        | 3.229 | 3.448 |
|                       | I $\cdots$ I                             | I2-I2                                            | 4.096 | 4.086          | 4.084                   |       | 4.097                   | 4.085          | 4.084          |                | 4.083                  |                        | 4.079 | 4.034 |

| <b>[Fe(qsal-I)<sub>2</sub>]NO<sub>3</sub>·2EtOH</b> |                            |         |       |       |
|-----------------------------------------------------|----------------------------|---------|-------|-------|
| <b>1<sup>st</sup> cooling</b>                       |                            |         |       |       |
| <b>300 K      150 K</b>                             |                            |         |       |       |
| <b><u>1D chains</u></b>                             |                            |         |       |       |
| <b>Fe-Fe</b>                                        |                            |         |       |       |
|                                                     | $\pi$ - $\pi$ (Type A)     |         | 3.427 | 3.325 |
|                                                     | $\pi$ - $\pi$ (Type B)     |         | 3.306 | 3.264 |
|                                                     | C-H...O                    | O2-H12  | 2.743 | 2.577 |
|                                                     | C-H...O                    | O1-H26  | 2.652 | 2.840 |
|                                                     | C-H...I                    | I2-H19  | 3.784 | 3.769 |
|                                                     | Fe-Fe (Type A)             |         | 7.014 | 7.048 |
|                                                     | Fe-Fe (Type B)             |         | 7.468 | 7.475 |
| <b>EtOH</b>                                         | OH <sub>e</sub> ...C-H     | O6-H31  | -     | 2.729 |
|                                                     | OH <sub>e</sub> ...C-H     | O6-H17  | 2.241 | 2.781 |
|                                                     | OH <sub>e</sub> ...N       | N2-H33a | 2.629 | -     |
| <b>NO<sub>3</sub></b>                               | O...C-H                    | O3-H1   | 2.600 | 2.387 |
|                                                     | O...C-H                    | O3-H15  | 2.679 | 2.523 |
| <b><u>2D plane</u></b>                              |                            |         |       |       |
| <b>P4AE</b>                                         | CH...C <sub>centroid</sub> |         | 2.902 | 2.911 |
|                                                     | $\pi$ - $\pi$              |         | 3.906 | 3.876 |
|                                                     | C-H...I                    | H3-I2   | 3.402 | 3.302 |
| <b>EtOH</b>                                         | OH <sub>e</sub> ...I       |         | 3.185 | 3.052 |
|                                                     | O...OH <sub>e</sub>        |         | 2.065 | 1.965 |
| <b>NO<sub>3</sub></b>                               | NO...I                     |         | 3.378 | 3.384 |
|                                                     | O...OH <sub>e</sub>        |         | 2.810 | 2.782 |
| <b><u>3D structure</u></b>                          |                            |         |       |       |
|                                                     | C-H...I                    | I1-H30  | 3.317 | 3.235 |
|                                                     | I...I                      | -       | -     | -     |



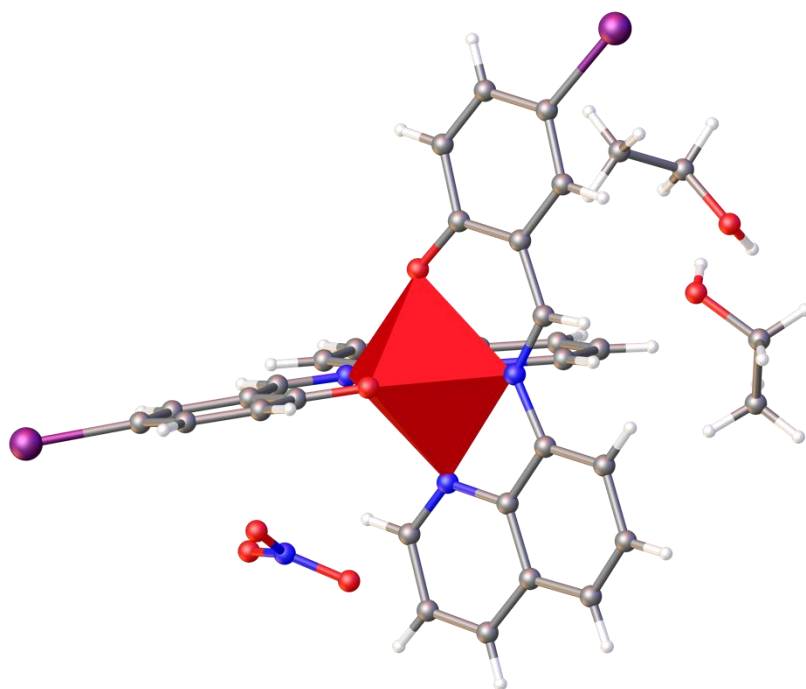

**Figure S1** Asymmetric unit of **2** at 150 K.

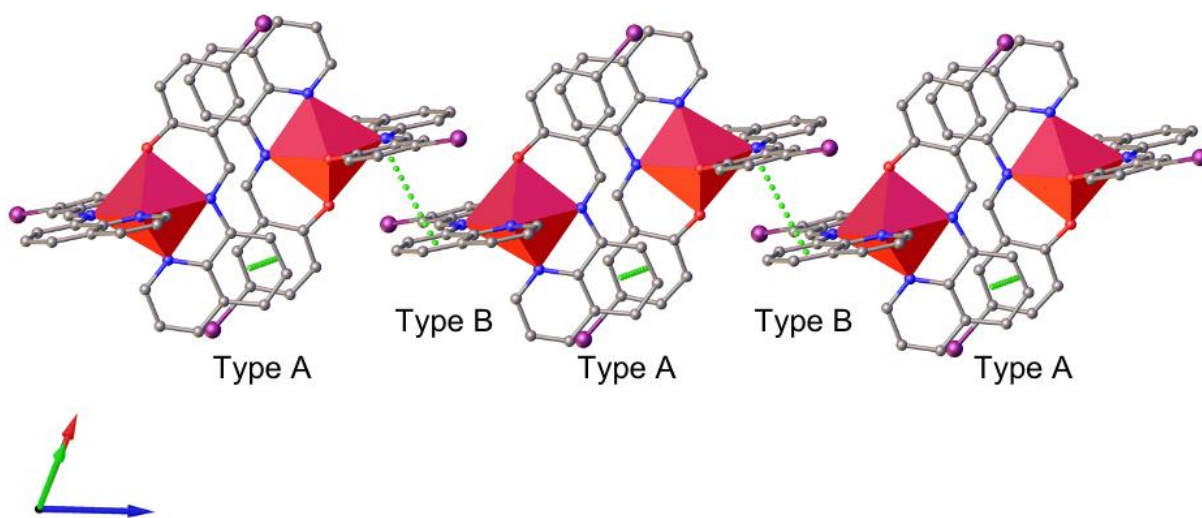

**Figure S2** Structure representation of the supramolecular 1D chain for **2** at 150 K.

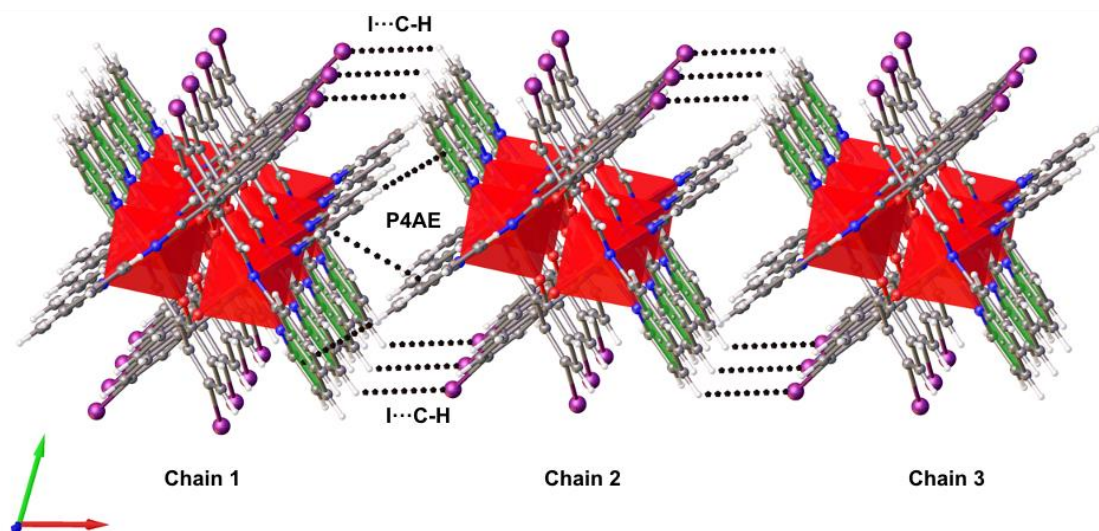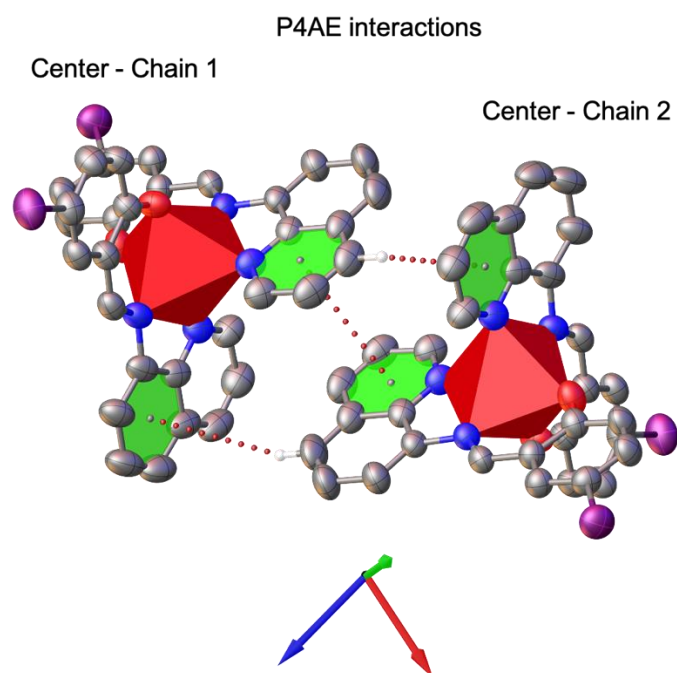

**Figure S3** Structure representation of the supramolecular 2D plane **2** at 300 K (top) and view of the P4AE interactions (bottom).

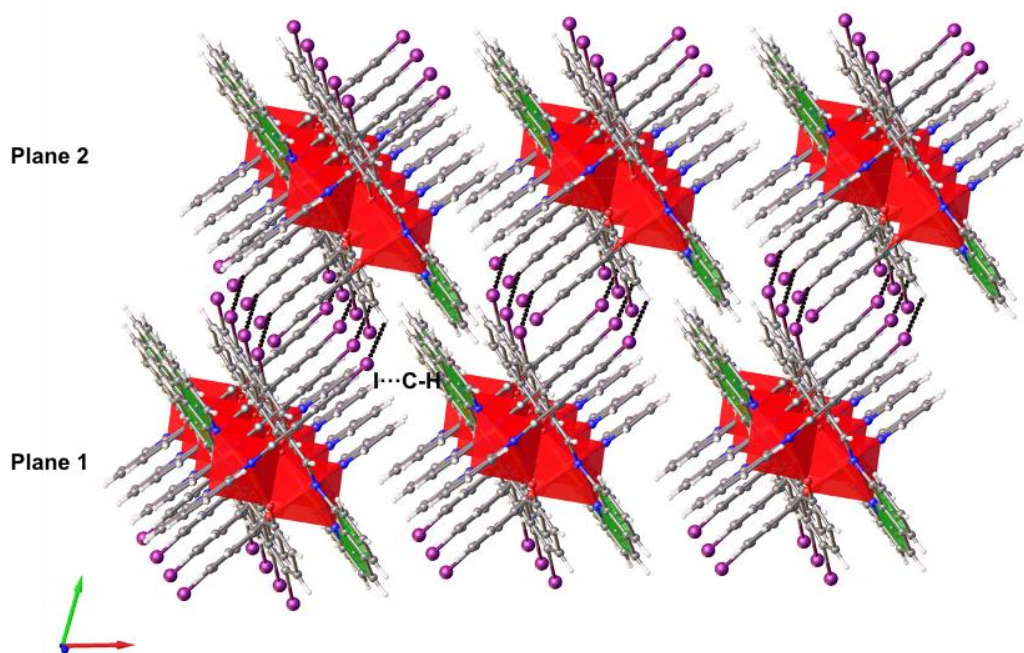

**Figure S4** Structure representation of the 3D structure of **2** at 300 K.

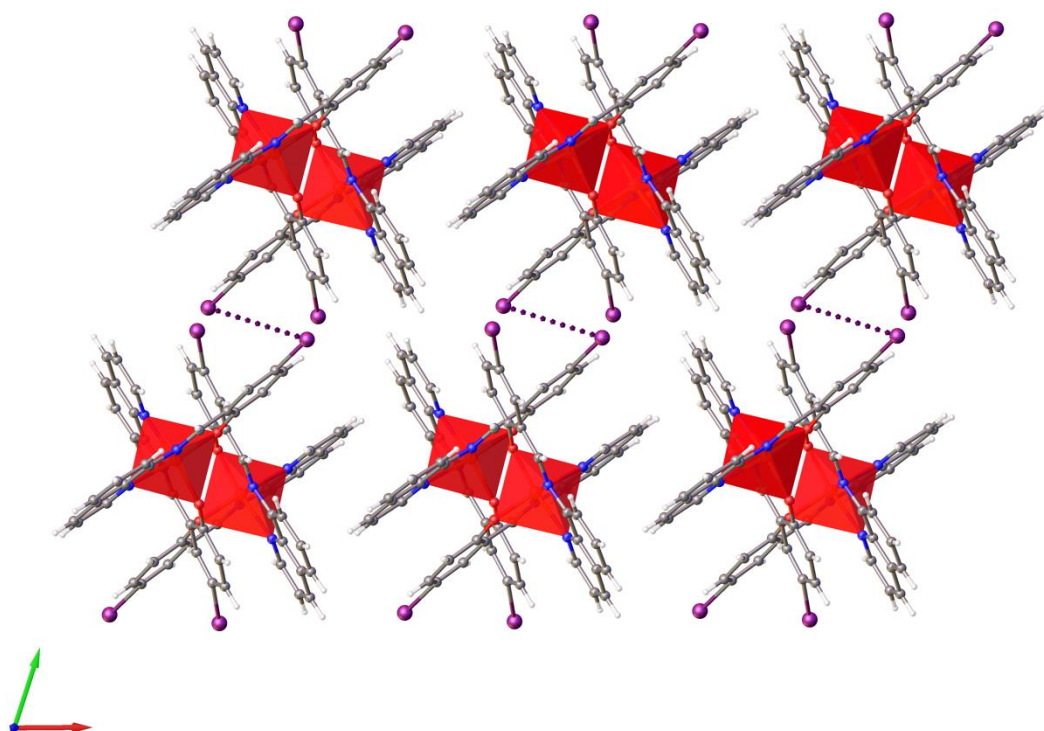

**Figure S5** 3D structure representation connecting the 2D planes through halogen interactions (I-I) for **1** at 300 K.

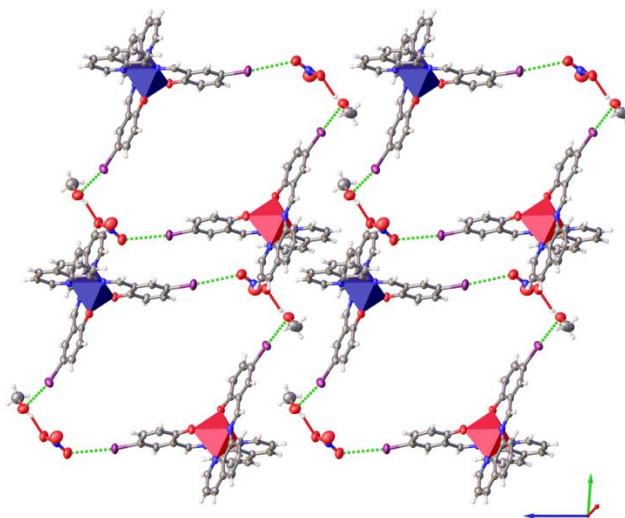

**Figure S6:** 2D supramolecular square structure connecting different chains involving the methanol and nitrate molecules for **1** at 150 K.

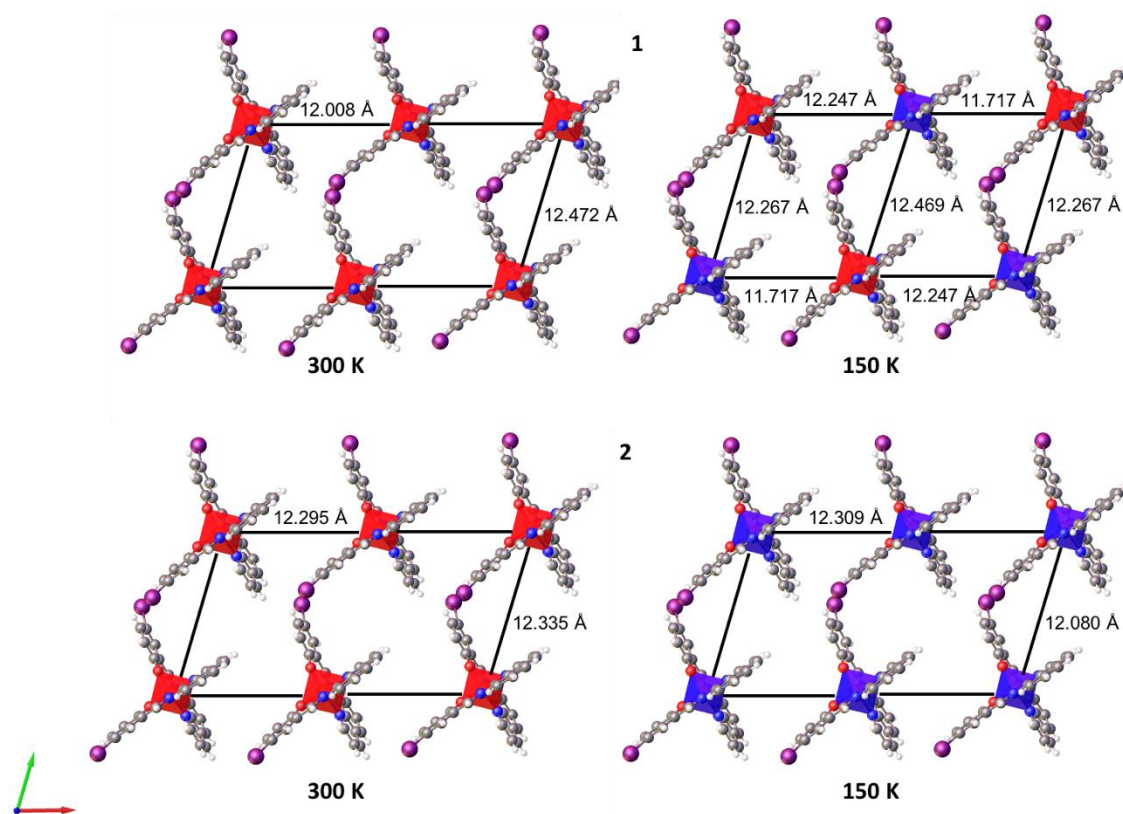

**Figure S7** View of  $d_{\text{chain}}$  (horizontal) and  $d_{\text{plane}}$  (vertical) of **1** (above) and **2** (below) at 300 K (left) and 150 K (right). Only one Fe per chain is shown for clarity. Red colour represent Fe HS and blue color Fe LS.

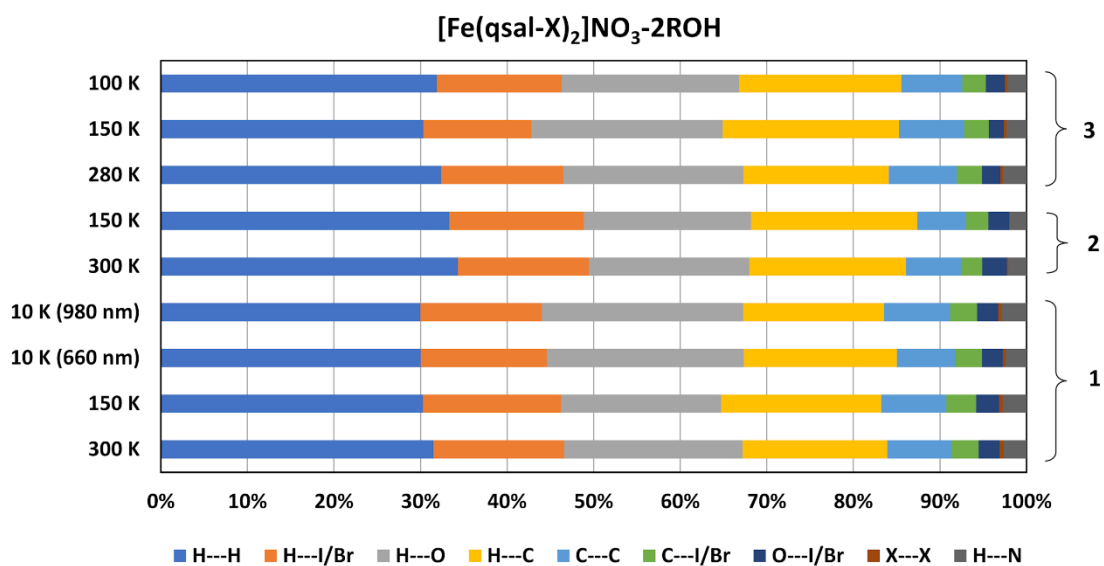

**Figure S8** Percentage contributions of interactions for **1–3** at all temperatures.

**Table S8** Intermolecular interactions contributions for [Fe(qsal-I)<sub>2</sub>]NO<sub>3</sub>·2MeOH **1**, [Fe(qsal-I)<sub>2</sub>]NO<sub>3</sub>·2EtOH **2** and [Fe(qsal-Br)<sub>2</sub>]NO<sub>3</sub>·2MeOH.

| Ligand  | Solvent       | Temp          | H...H | H...I/Br | H...O | H...C | C...C | C...I/Br | O...I/Br | X...X | H...N |
|---------|---------------|---------------|-------|----------|-------|-------|-------|----------|----------|-------|-------|
| qsal-I  | MeOH <b>1</b> | 300 K         | 31.3  | 15.0     | 20.5  | 16.6  | 7.4   | 3.1      | 2.4      | 0.5   | 2.6   |
|         |               | 150 K         | 29.8  | 15.7     | 18.2  | 18.2  | 7.4   | 3.4      | 2.6      | 0.4   | 2.7   |
|         |               | 10 K (660 nm) | 29.7  | 14.4     | 22.5  | 17.5  | 6.7   | 3.0      | 2.4      | 0.3   | 2.4   |
|         |               | 10 K (980 nm) | 29.5  | 13.8     | 22.9  | 16.0  | 7.5   | 3.1      | 2.4      | 0.4   | 2.8   |
| qsal-I  | EtOH <b>2</b> | 300 K         | 33.5  | 14.8     | 18.1  | 17.7  | 6.2   | 2.4      | 2.8      | 0.1   | 2.1   |
|         |               | 150 K         | 33.3  | 15.5     | 19.3  | 19.2  | 5.6   | 2.6      | 2.4      | 0.1   | 1.9   |
| qsal-Br | MeOH          | 280 K         | 32.2  | 14.0     | 20.7  | 16.7  | 7.8   | 2.9      | 2.1      | 0.3   | 2.7   |
|         |               | 150 K         | 29.9  | 12.3     | 21.8  | 20.1  | 7.4   | 2.8      | 1.7      | 0.3   | 2.3   |
|         |               | 100 K         | 31.8  | 14.4     | 20.5  | 18.7  | 7.0   | 2.7      | 2.2      | 0.3   | 2.2   |

all contacts

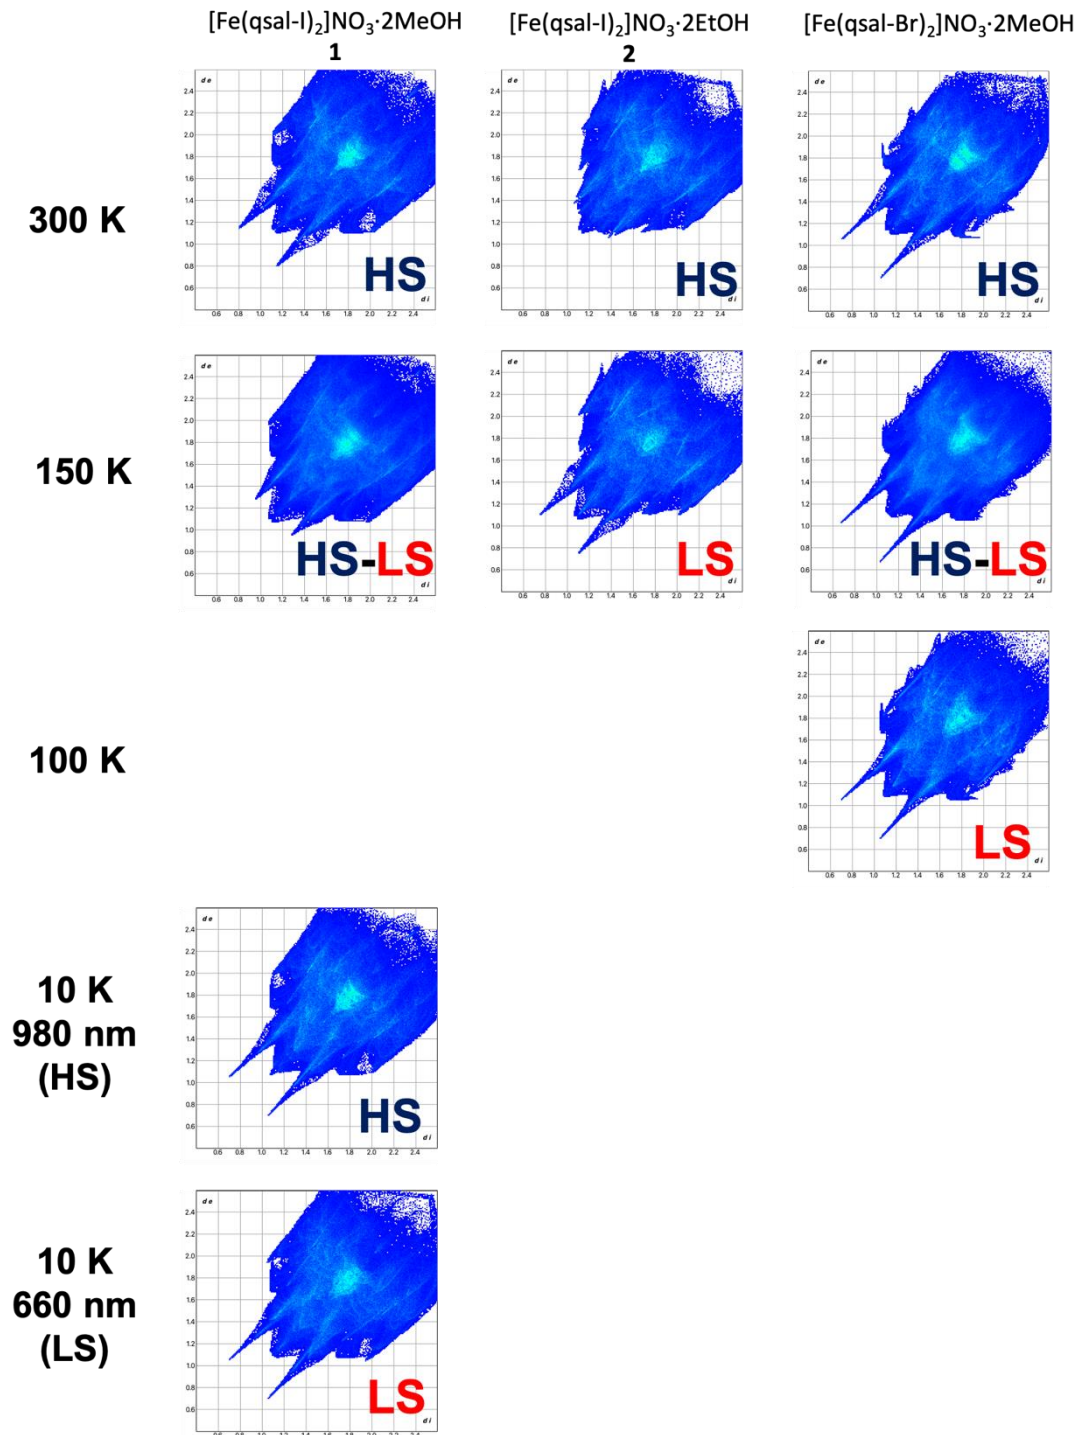

## H...O/O...H interactions

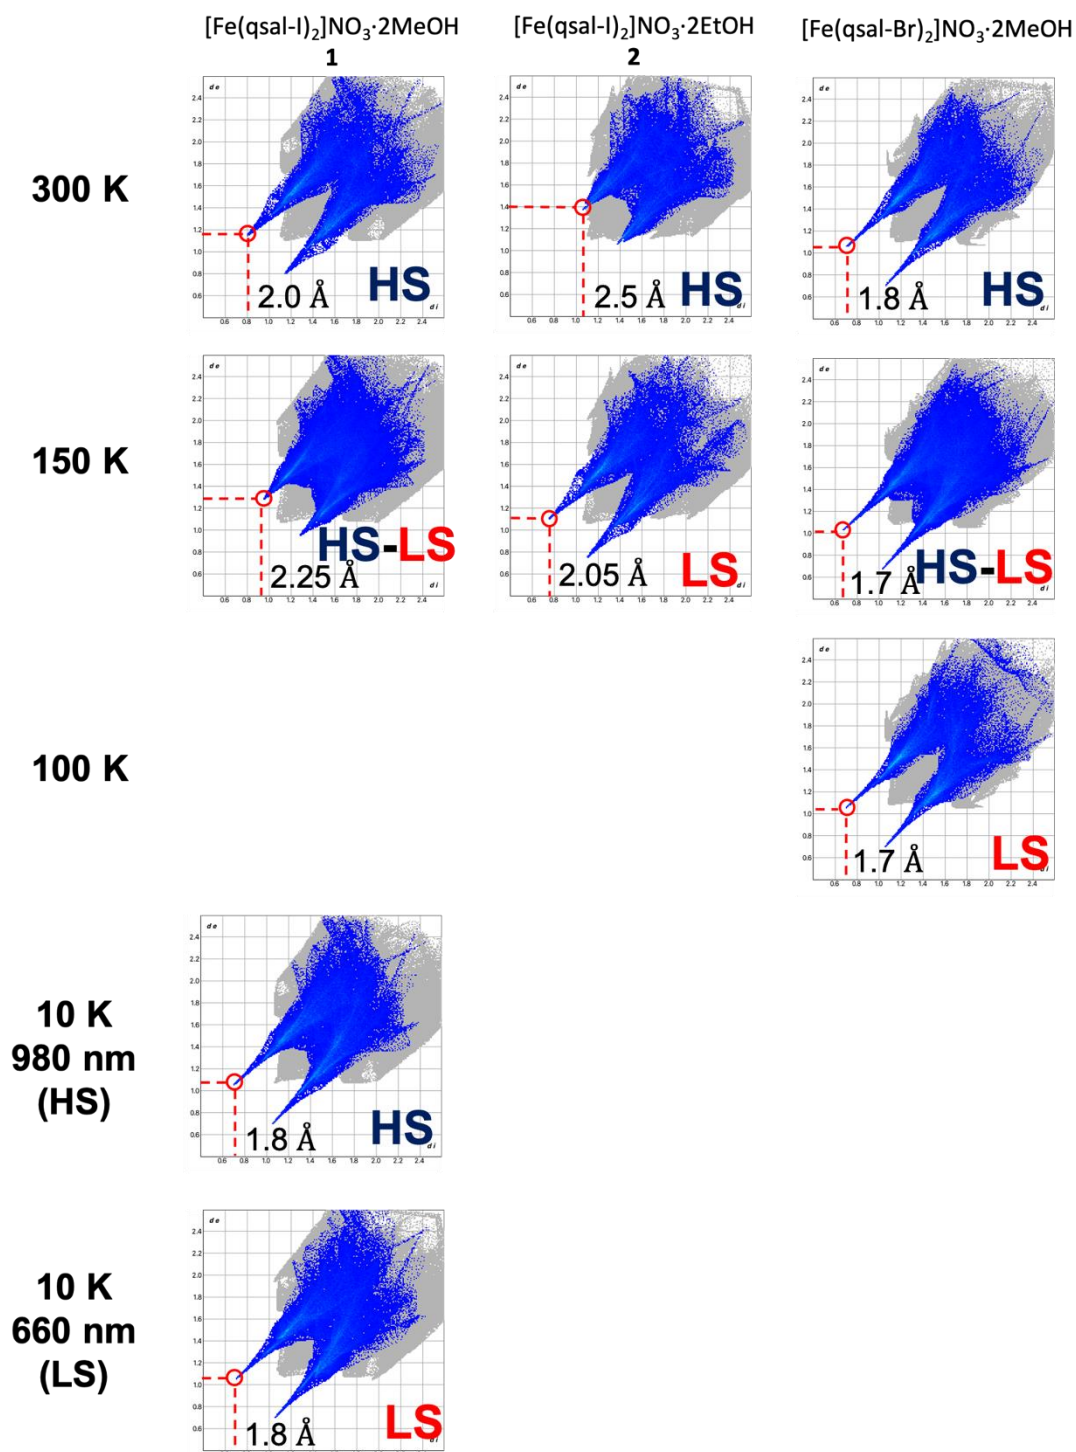

**Figure S9** Hirshfeld surface 2D fingerprint plots: all contact (top), H...O/O...H interactions (bottom) for  $[\text{Fe}(\text{qsal-I})_2]\text{NO}_3 \cdot 2\text{MeOH}$  **1**,  $[\text{Fe}(\text{qsal-I})_2]\text{NO}_3 \cdot 2\text{EtOH}$  **2** and  $[\text{Fe}(\text{qsal-Br})_2]\text{NO}_3 \cdot 2\text{MeOH}$  at different temperatures.

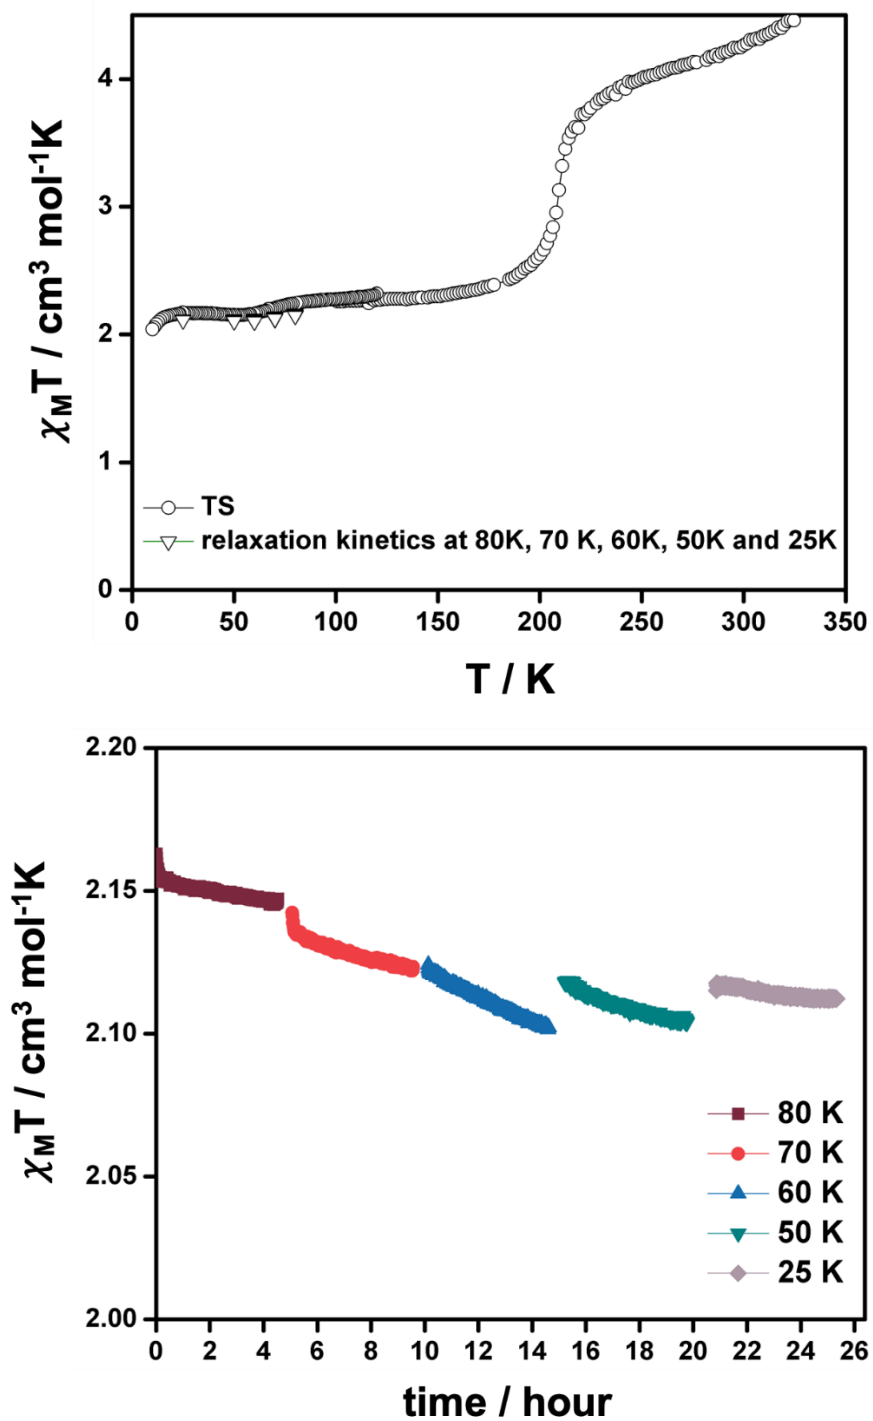

**Figure S10**  $\chi_M T$  versus  $T$  plot of **1** (upper picture). The black diamonds in the upper picture stand for the relaxation kinetics (lower picture) performed from the [HS-LS] state showing the long lifetime of this state.



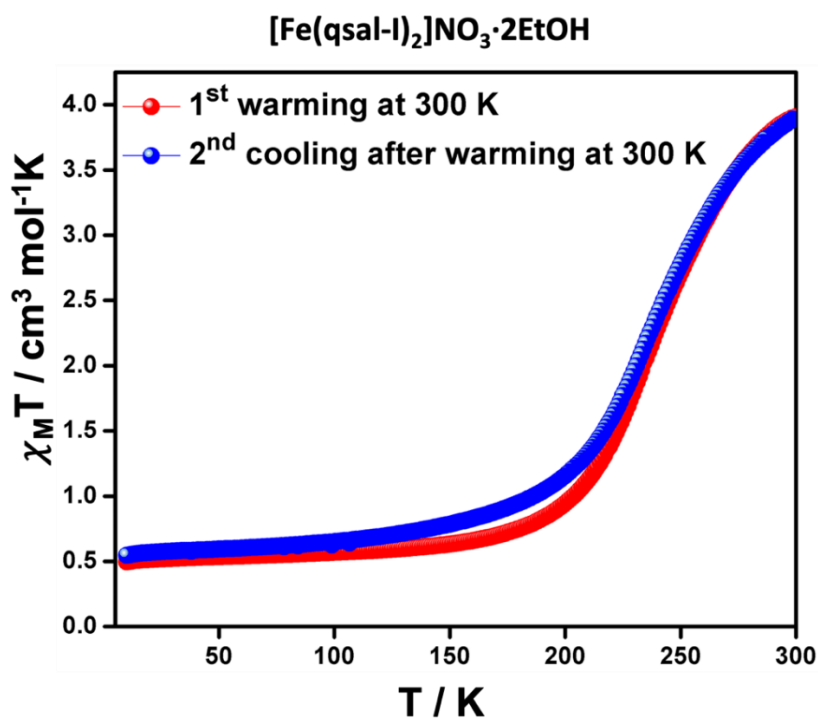

**Figure S11**  $\chi_M T$  versus  $T$  plot of **2** from 10 to 300 K (1<sup>st</sup> warming) and from 300 to 10 K (2<sup>nd</sup> cooling).

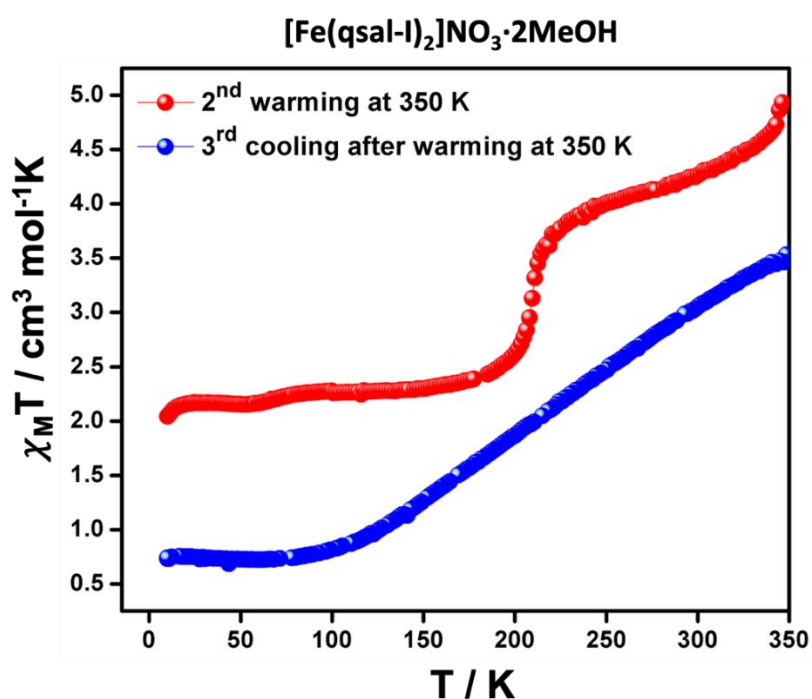

**Figure S12**  $\chi_M T$  versus  $T$  plot of **1** from 10 to 350 K (2<sup>nd</sup> warming) and from 350 to 10 K (3<sup>rd</sup> cooling). Data points were measured every K up to 350 K (2<sup>nd</sup> warming) and then the sample left at 350 K before cooling again. The discontinuity at 350 K may be caused by the combination of some slight decentering caused by the increasing temperature and the loss of solvent (MeOH).

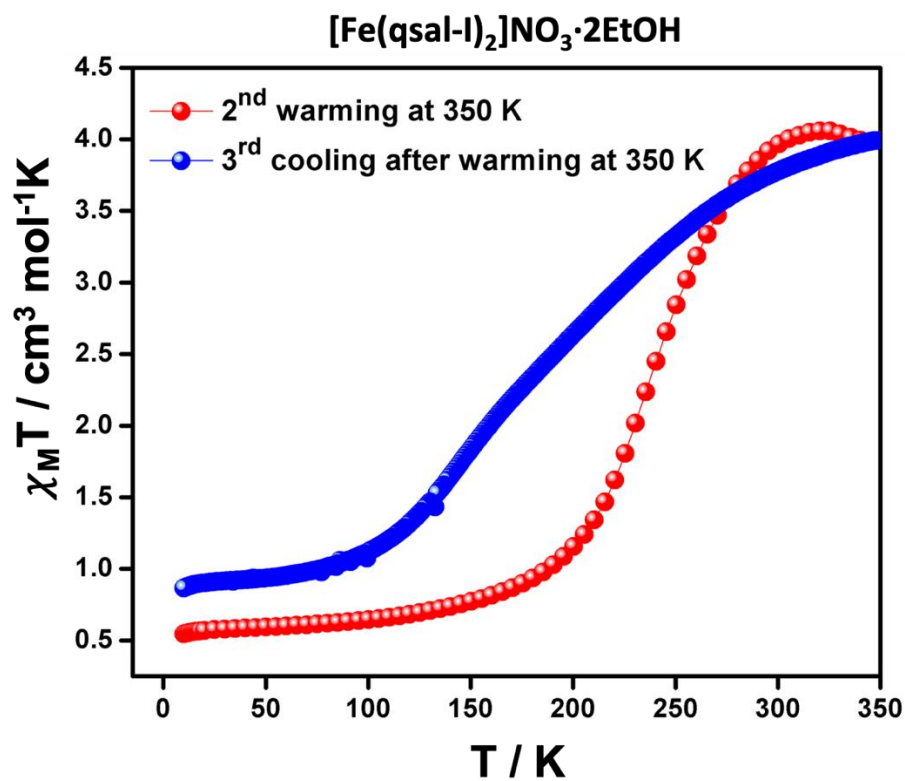

**Figure S13**  $\chi_M T$  versus  $T$  plot of **2** from 10 to 350 K (2<sup>nd</sup> warming) and from 350 to 10 K (3<sup>rd</sup> cooling).

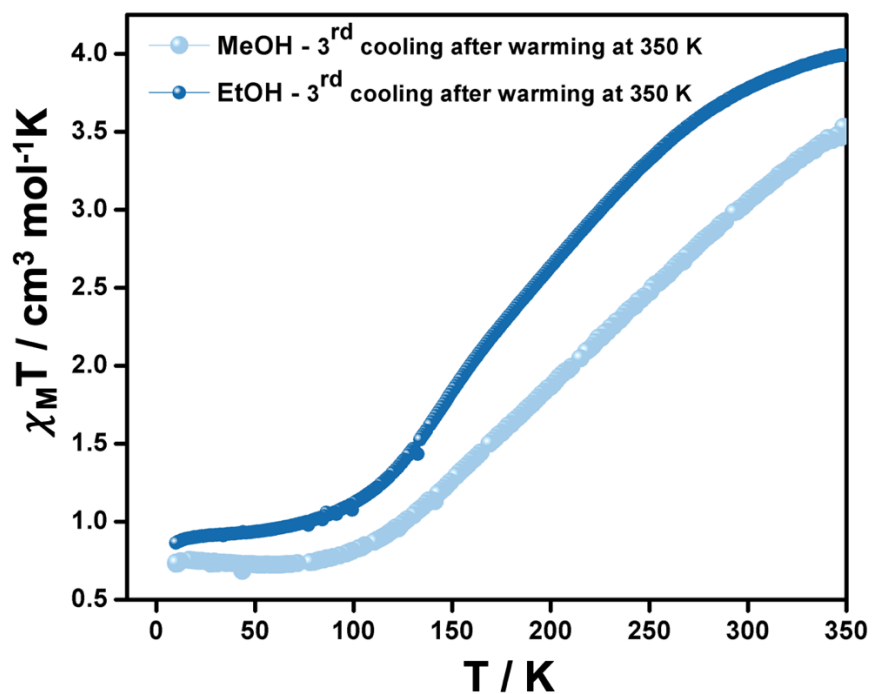

**Figure S14**  $\chi_M T$  versus  $T$  plot of **1** (light blue) and **2** (dark blue) from 350 to 10 K (3<sup>rd</sup> cooling).

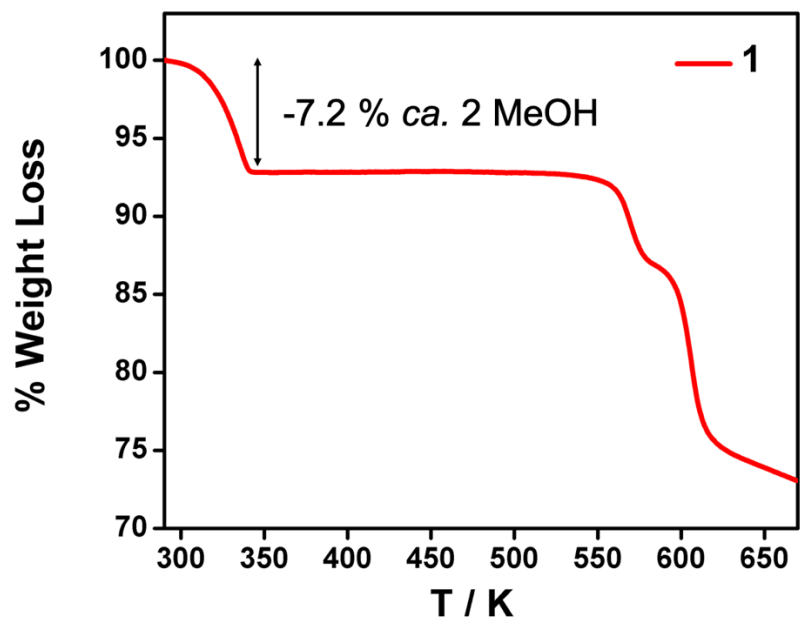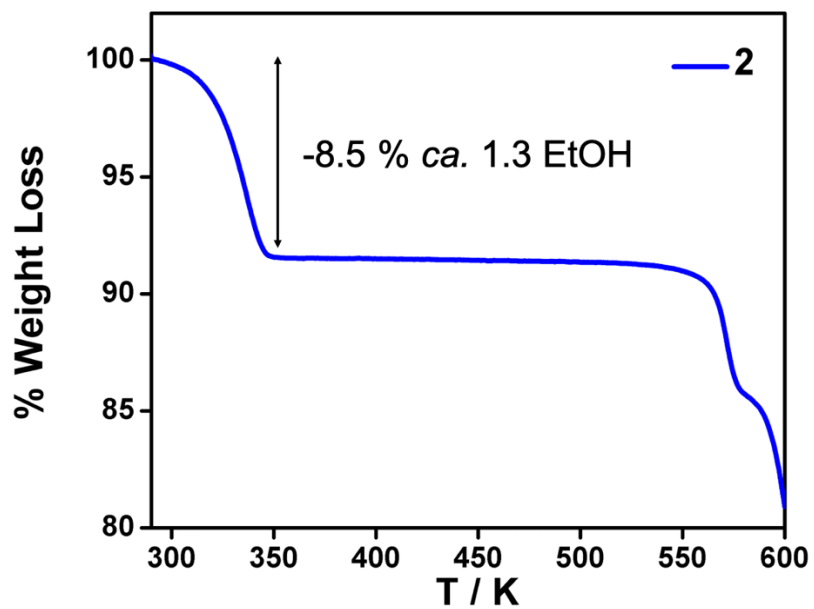

Figure S15 TGA curves for 1 (red) and 2 (blue).

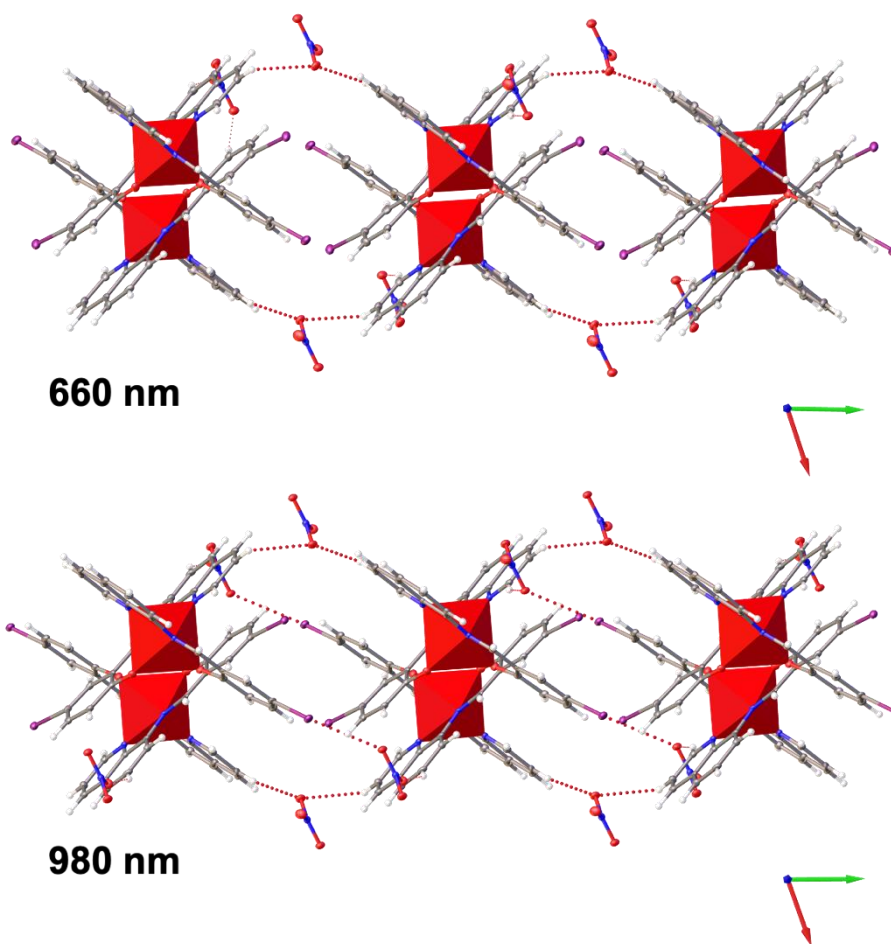

**Figure S16** Structure representation of the 2D supramolecular structure showing the I $\cdots$ O(nitrate) halogen bond in **1** upon irradiation at 660 nm (top) and 980 nm (bottom).

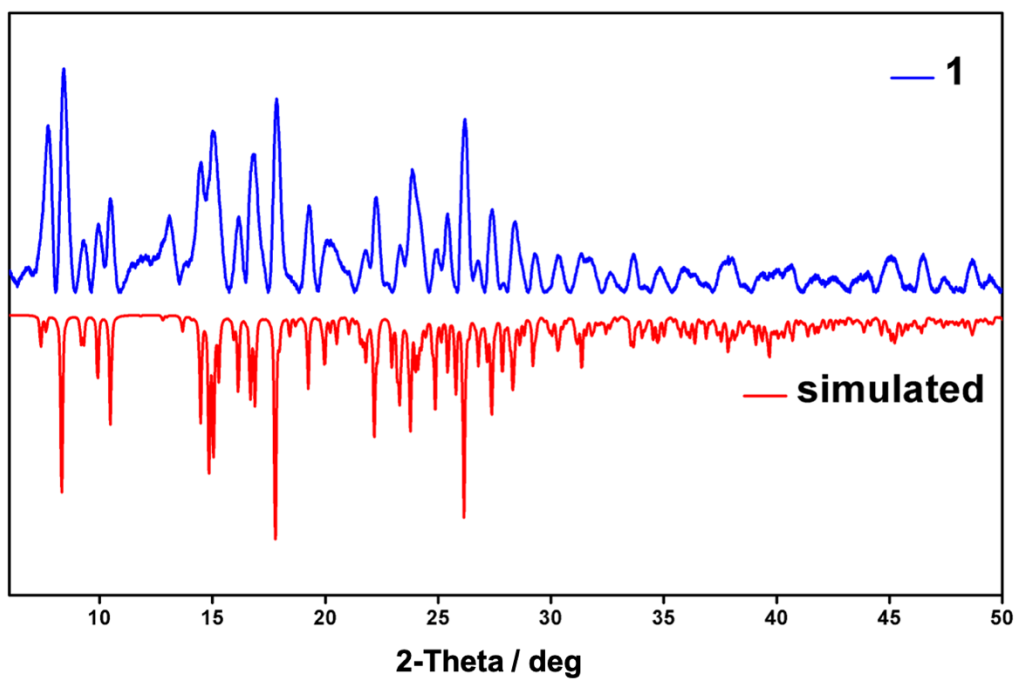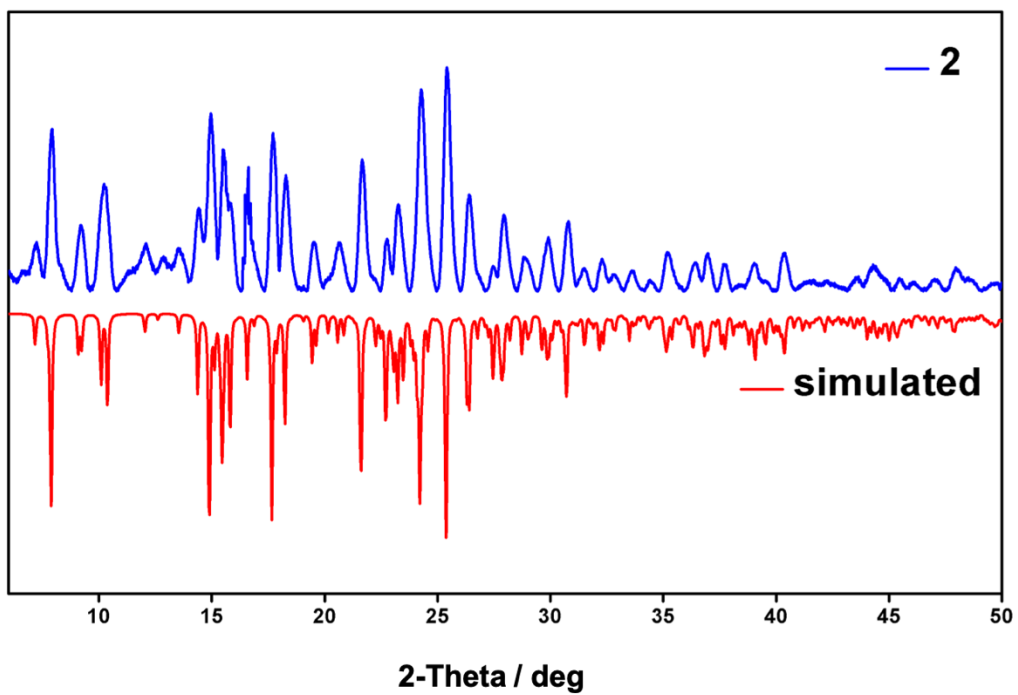

**Figure S17** Experimental PXR D diffractograms (blue) and the corresponding simulated patterns (red) for **1** (up) and **2** (down) at room temperature.

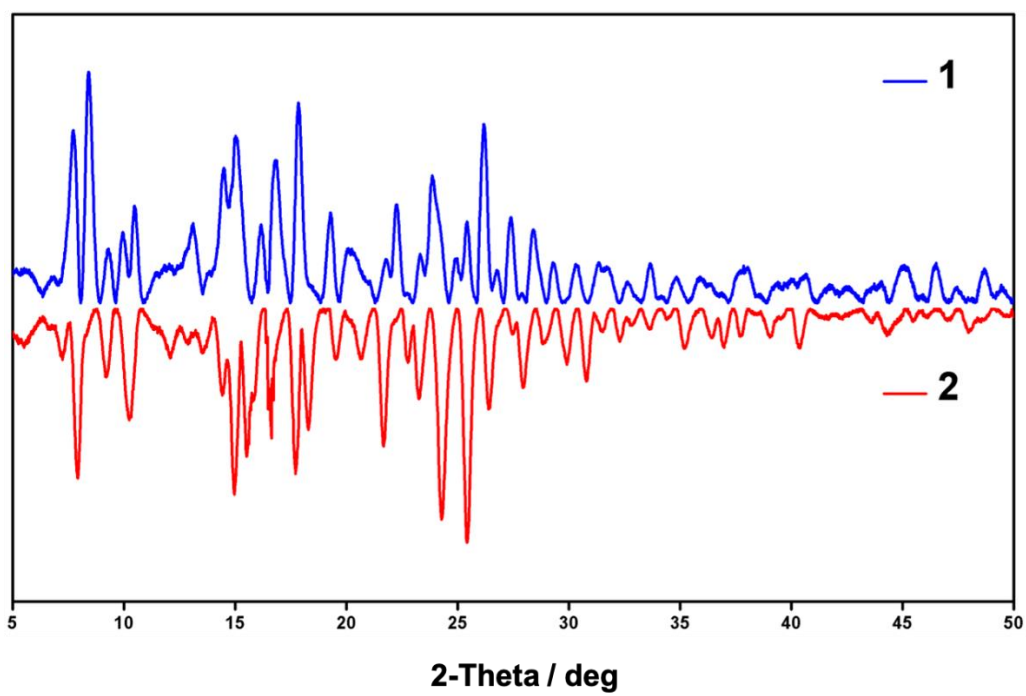

**Figure S18** Comparison of the experimental PXRD diffractograms of **1** (blue) and **2** (red) at room temperature.

## References

- 1 J. Sirirak, W. Phonsri, D. J. Harding, P. Harding, P. Phommon, W. Chaoprasa, R. M. Hendry, T. M. Roseveare and H. Adams, *J. Mol. Struct.*, 2013, **1036**, 439–446.
- 2 1996.
- 3 G. M. Sheldrick, *Acta Crystallogr. Sect. A Found. Adv.*, 2015, **71**, 3–8.
- 4 G. M. Sheldrick, *Acta Crystallogr. Sect. C Struct. Chem.*, 2015, **71**, 3–8.
- 5 O. V. Dolomanov, L. J. Bourhis, R. J. Gildea, J. A. K. Howard and H. Puschmann, *J. Appl. Crystallogr.*, 2009, **42**, 339–341.
- 6 G. Chastanet, C. Desplanches, C. Baldé, P. Rosa, M. Marchivie and P. Guionneau, *Chem. Squared*, 2018, **2**, 2.
- 7 J. F. Létard, L. Capes, G. Chastanet, N. Moliner, S. Létard, J. A. Real and O. Kahn, *Chem. Phys. Lett.*, 1999, **313**, 115–120.
- 8 G. Chastanet, C. Desplanches, M. Gonidec, P. Guionneau, M. Marchivie, C. Mathonière and P. Rosa, *Light-Induced Excited Spin-State Trapping: A Methodological Approach*, Elsevier Inc., 2021.
- 9 D. J. Harding, W. Phonsri, P. Harding, K. S. Murray, B. Moubaraki and G. N. L. Jameson, *Dalton Trans.*, 2015, **44**, 15079–15082.
- 10 K. Miyano, T. Nishida, H. Ono, D. Hamada, T. Fujinami, N. Matsumoto and Y. Sunatsuki, *Inorg. Chim. Acta*, 2016, **439**, 49–54.
- 11 Z.-Y. Li, H. Ohtsu, T. Kojima, J.-W. Dai, T. Yoshida, B. K. Breedlove, W.-X. Zhang, H. Iguchi, O. Sato, M. Kawano and M. Yamashita, *Angew. Chem. Int. Ed.*, 2016, **55**, 5184–5189.
- 12 M. Griffin, S. Shakespeare, H. J. Shepherd, C. J. Harding, J.-F. Létard, C. Desplanches, A. E. Goeta, J. A. K. Howard, A. K. Powell, V. Mereacre, Y. Garcia, A. D. Naik, H. Müller-Bunz and G. G. Morgan, *Angew. Chem. Int. Ed.*, 2011, **50**, 896–900.
- 13 K. D. Murnaghan, C. Carbonera, L. Toupet, M. Griffin, M. M. Dîrtu, C. Desplanches, Y. Garcia, E. Collet, J. F. Létard and G. G. Morgan, *Chem. - A Eur. J.*, 2014, **20**, 5613–5618.
- 14 B. J. C. Vieira, J. T. Coutinho, I. C. Santos, L. C. J. Pereira, J. C. Waerenborgh and V. Da Gama, *Inorg. Chem.*, 2013, **52**, 3845–3850.
- 15 Z. Liu, Z. Yao and J. Tao, *Inorg. Chem.*, 2021, **60**, 10291–10301.
- 16 H. J. Sheng, C. C. Xia, X. Y. Zhang, C. C. Zhang, W. J. Ji, Y. Zhao and X. Y. Wang, *Inorg. Chem.*, 2022, **61**, 12726–12735.
- 17 M. Nakaya, R. Ohtani, L. F. Lindoy and S. Hayami, *Inorg. Chem. Front.*, 2021, **8**, 484–498.
- 18 S. Hayami, K. Hiki, T. Kawahara, Y. Maeda, D. Urakami, K. Inoue, M. Ohama, S. Kawata and O. Sato, *Chem. - A Eur. J.*, 2009, **15**, 3497–3508.
- 19 A. Tsukiashi, M. Nakaya, F. Kobayashi, R. Ohtani, M. Nakamura, J. M. Harrowfield, Y. Kim and S. Hayami, *Inorg. Chem.*, 2018, **57**, 2834–2842.
- 20 K. Takahashi, H. Cui, H. Kobayashi, Y. Einaga and O. Sato, *Chem. Lett.*, 2005, **34**, 1240–1241.
- 21 K. Fukuroi, K. Takahashi, T. Mochida, T. Sakurai, H. Ohta, T. Yamamoto, Y. Einaga and H. Mori, *Angew. Chem. Int. Ed.*, 2014, **53**, 1983–1986.
- 22 S. Murata, K. Takahashi, T. Mochida, T. Sakurai, H. Ohta, T. Yamamoto and Y. Einaga, *Dalton Trans.*, 2017, **46**, 5786–5789.
- 23 I.-R. Jeon, C. Mathonière, R. Clérac, M. Rouzières, O. Jeannin, E. Trzop, E. Collet and M. Fourmigué, *Chem. Commun.*, 2017, **53**, 10283–10286.
- 24 T. Togo, S. A. Amolegbe, R. Yamaguchi, T. Kuroda-Sowa, M. Nakaya, K. Shimayama, M. Nakamura and S. Hayami, *Chem. Lett.*, 2013, **42**, 1542–1544.
- 25 C. Faulmann, J. Chahine, L. Valade, G. Chastanet, J. Létard and D. de Caro, *Eur. J. Inorg. Chem.*, 2013, **2013**, 1058–1067.
- 26 T. Boonprab, S. J. Lee, S. G. Telfer, K. S. Murray, W. Phonsri, G. Chastanet, E. Collet, E.

- Trzop, G. N. L. Jameson, P. Harding and D. J. Harding, *Angew. Chem. Int. Ed.*, 2019, **58**, 11811–11815.
- 27 S. Hayami, Z. Gu, M. Shiro, Y. Einaga, A. Fujishima and O. Sato, *J. Am. Chem. Soc.*, 2000, **122**, 7126–7127.
- 28 G. Juhász, S. Hayami, O. Sato and Y. Maeda, *Chem. Phys. Lett.*, 2002, **364**, 164–170.
- 29 T. Shimizu, Y. Komatsu, H. Kamihata, Y. H. Lee, A. Fuyuhiko, S. Iijima and S. Hayami, *J. Incl. Phenom. Macrocycl. Chem.*, 2011, **71**, 363–369.
- 30 K. Takahashi, H.-B. Cui, Y. Okano, H. Kobayashi, H. Mori, H. Tajima, Y. Einaga and O. Sato, *J. Am. Chem. Soc.*, 2008, **130**, 6688–6689.
- 31 W. Thammasangwan, P. Harding, S. G. Telfer, A. Alkaş, W. Phonsri, K. S. Murray, R. Clérac, M. Rouzières, G. Chastanet and D. J. Harding, *Eur. J. Inorg. Chem.*, 2020, **2020**, 1325–1330.
- 32 M. Nakaya, K. Shimayama, K. Takami, K. Hirata, A. S. Alao, M. Nakamura, L. F. Lindoy and S. Hayami, *Chem. Lett.*, 2014, **43**, 1058–1060.
- 33 K. D. Murnaghan, C. Carbonera, L. Toupet, M. Griffin, M. M. Dîrtu, C. Desplanches, Y. Garcia, E. Collet, J.-F. Létard and G. G. Morgan, *Chem. - A Eur. J.*, 2014, **20**, 5613–5618.
- 34 S. Hayami, K. Hashiguchi, K. Inoue and Y. Maeda, *J. Nucl. Radiochem. Sci.*, 2004, **5**, N1–N3.
- 35 K. Takahashi, K. Kawamukai, M. Okai, T. Mochida, T. Sakurai, H. Ohta, T. Yamamoto, Y. Einaga, Y. Shiota and K. Yoshizawa, *Chem. - A Eur. J.*, 2016, **22**, 1253–1257.
- 36 Z.-Y. Li, J.-W. Dai, K. J. Gagnon, H.-L. Cai, T. Yamamoto, Y. Einaga, H.-H. Zhao, S. Kanegawa, O. Sato, K. R. Dunbar and R.-G. Xiong, *Dalton Trans.*, 2013, **42**, 14685.
